# Supplementary material
Source: PubMed Central journal article supplement (PMC8782754)
Supplement: mmc1.pdf [file mmc1.pdf]

| Study                                      | Risk of bias |    |    | Overall |
|--------------------------------------------|--------------|----|----|---------|
|                                            | D1           | D2 | D3 |         |
| Abbas et al, 2021 [ID# 1]                  | ⊗            | ⊖  | ⊖  | ⊖       |
| Abdellah et al, 2021 [ID# 2]               | ⊖            | ⊖  | ⊖  | ⊖       |
| Abdulah et al, 2020 [ID# 3]                | ⊕            | ⊖  | ⊖  | ⊕       |
| Agberotimi et al, 2020 [ID# 4]             | ⊕            | ⊖  | ⊖  | ⊕       |
| Ahmad et al, 2020 [ID# 5]                  | ⊗            | ⊕  | ⊕  | ⊖       |
| Ak..nc.. et al, 2021 [ID# 6]               | ⊕            | ⊖  | ⊖  | ⊖       |
| Al Ammari et al, 2021 [ID# 7]              | ⊕            | ⊖  | ⊖  | ⊕       |
| Al Maqbali et al, 2021 [ID# 8]             | ⊖            | ⊖  | ⊖  | ⊖       |
| Al-Ajlouni et al, 2020 [ID# 9]             | ⊖            | ⊕  | ⊖  | ⊖       |
| Alamrawy et al, 2021 [ID# 10]              | ⊕            | ⊖  | ⊖  | ⊕       |
| AlAteeq et al, 2021 [ID# 11]               | ⊕            | ⊖  | ⊖  | ⊖       |
| Alessi et al, 2020 [ID# 12]                | ⊖            | ⊖  | ⊖  | ⊖       |
| Alfonsi et al, 2021 [ID# 13]               | ⊕            | ⊖  | ⊖  | ⊖       |
| Alharbi et al, 2021 [ID# 14]               | ⊖            | ⊖  | ⊖  | ⊖       |
| Ali et al, 2021 [ID# 15]                   | ⊗            | ⊗  | ⊗  | ⊖       |
| Almater et al, 2020 [ID# 16]               | ⊖            | ⊕  | ⊖  | ⊖       |
| Alnofaiey et al, 2020 [ID# 17]             | ⊕            | ⊖  | ⊖  | ⊕       |
| Alomayri et al, 2020 [ID# 18]              | ⊕            | ⊖  | ⊖  | ⊕       |
| Alqahtani et al, 2021 [ID# 19]             | ⊕            | ⊖  | ⊖  | ⊖       |
| AlRasheed et al, 2021 [ID# 20]             | ⊖            | ⊖  | ⊖  | ⊖       |
| Alshekaili et al, 2020 [ID# 21]            | ⊖            | ⊖  | ⊖  | ⊖       |
| Ammar et al, 2020 [ID# 22]                 | ⊕            | ⊖  | ⊖  | ⊕       |
| Amra et al, 2021 [ID# 23]                  | ⊖            | ⊖  | ⊖  | ⊖       |
| Assenza et al, 2020 [ID# 24]               | ⊕            | ⊖  | ⊖  | ⊕       |
| Atas et al, 2021 [ID# 25]                  | ⊗            | ⊖  | ⊖  | ⊖       |
| Bacaro et al, 2020 [ID# 26]                | ⊕            | ⊖  | ⊖  | ⊕       |
| Badellino et al, 2020 [ID# 27]             | ⊕            | ⊖  | ⊖  | ⊕       |
| Bai et al, 2020 [ID# 28]                   | ⊗            | ⊖  | ⊖  | ⊖       |
| Bajaj et al, 2020 [ID# 29]                 | ⊕            | ⊖  | ⊖  | ⊕       |
| Barrea et al, 2020 [ID# 30]                | ⊖            | ⊖  | ⊖  | ⊖       |
| Barua et al, 2021 [ID# 31]                 | ⊕            | ⊖  | ⊖  | ⊕       |
| Bas..kan et al, 2021 [ID# 32]              | ⊖            | ⊖  | ⊖  | ⊖       |
| Beck et al, 2020 [ID# 33]                  | ⊗            | ⊖  | ⊖  | ⊖       |
| Benham et al, 2020 [ID# 34]                | ⊕            | ⊖  | ⊖  | ⊖       |
| Bezerra et al, 2020 [ID# 35]               | ⊗            | ⊖  | ⊖  | ⊖       |
| Bhat et al, 2020 [ID# 36]                  | ⊕            | ⊖  | ⊖  | ⊕       |
| Bigalke et al, 2020 [ID# 37]               | ⊖            | ⊖  | ⊖  | ⊖       |
| Blekas et al, 2020 [ID# 38]                | ⊕            | ⊖  | ⊖  | ⊕       |
| Bohken et al, 2020 [ID# 39]                | ⊗            | ⊖  | ⊖  | ⊖       |
| Brito-Marques et al, 2021 [ID# 40]         | ⊕            | ⊖  | ⊖  | ⊖       |
| Caballero-Domínguez et al, 2020 [ID# 41]   | ⊕            | ⊖  | ⊖  | ⊕       |
| Cai et al, 2020 [ID# 42]                   | ⊕            | ⊖  | ⊖  | ⊕       |
| Cai et al, 2020 [ID# 43]                   | ⊕            | ⊖  | ⊖  | ⊕       |
| Casagrande et al, 2020 [ID# 44]            | ⊕            | ⊖  | ⊖  | ⊕       |
| Cellini et al, 2021 [ID# 45]               | ⊕            | ⊖  | ⊖  | ⊖       |
| Cellini et al, 2020 [ID# 46]               | ⊕            | ⊖  | ⊖  | ⊕       |
| Cellini et al, 2021 [ID# 47]               | ⊕            | ⊖  | ⊖  | ⊕       |
| Chatterjee et al, 2021 [ID# 48]            | ⊕            | ⊖  | ⊖  | ⊖       |
| Chen et al, 2021 [ID# 49]                  | ⊕            | ⊖  | ⊖  | ⊕       |
| Cheng et al, 2020 [ID# 50]                 | ⊕            | ⊖  | ⊖  | ⊕       |
| Cheng et al, 2021 [ID# 51]                 | ⊕            | ⊖  | ⊖  | ⊕       |
| Chi et al, 2021 [ID# 52]                   | ⊕            | ⊖  | ⊖  | ⊕       |
| Chouchou et al, 2021 [ID# 53]              | ⊕            | ⊖  | ⊖  | ⊕       |
| Coiro et al, 2021 [ID# 54]                 | ⊖            | ⊖  | ⊖  | ⊖       |
| Cui et al, 2020 [ID# 55]                   | ⊕            | ⊖  | ⊖  | ⊕       |
| Czeisler et al, 2021 [ID# 56]              | ⊖            | ⊖  | ⊖  | ⊖       |
| Dai et al, 2020 [ID# 57]                   | ⊕            | ⊖  | ⊖  | ⊕       |
| Das et al, 2021 [ID# 58]                   | ⊖            | ⊖  | ⊖  | ⊖       |
| Das..demir et al, 2021 [ID# 59]            | ⊗            | ⊗  | ⊖  | ⊖       |
| de Medeiros et al, 2021 [ID# 60]           | ⊗            | ⊗  | ⊗  | ⊗       |
| Demartini et al, 2020 [ID# 61]             | ⊕            | ⊖  | ⊖  | ⊕       |
| Du et al, 2021 [ID# 62]                    | ⊕            | ⊖  | ⊖  | ⊖       |
| Duran et al, 2021 [ID# 63]                 | ⊕            | ⊖  | ⊖  | ⊕       |
| Ehadi et al, 2021 [ID# 64]                 | ⊕            | ⊖  | ⊖  | ⊖       |
| ElHafeez et al, 2021 [ID# 65]              | ⊖            | ⊖  | ⊖  | ⊖       |
| Elkholy et al, 2021 [ID# 66]               | ⊕            | ⊖  | ⊖  | ⊕       |
| Essangri et al, 2021 [ID# 67]              | ⊕            | ⊖  | ⊖  | ⊕       |
| Falkingham et al, 2020 [ID# 68]            | ⊗            | ⊖  | ⊖  | ⊖       |
| Fekih-Romdhane et al, 2020 [ID# 69]        | ⊕            | ⊖  | ⊖  | ⊕       |
| Fidanci et al, 2020 [ID# 70]               | ⊕            | ⊖  | ⊖  | ⊖       |
| Filippo et al, 2021 [ID# 71]               | ⊗            | ⊖  | ⊖  | ⊖       |
| Florin et al, 2020 [ID# 72]                | ⊕            | ⊖  | ⊖  | ⊕       |
| Franceschini et al, 2020 [ID# 73]          | ⊕            | ⊖  | ⊖  | ⊕       |
| Fu et al, 2020 [ID# 74]                    | ⊕            | ⊖  | ⊖  | ⊕       |
| García-Priego et al, 2020 [ID# 75]         | ⊗            | ⊖  | ⊖  | ⊖       |
| Garriga-Baraut et al, 2021 [ID# 76]        | ⊗            | ⊗  | ⊗  | ⊗       |
| Gas et al, 2021 [ID# 77]                   | ⊖            | ⊖  | ⊖  | ⊖       |
| Ge et al, 2020 [ID# 78]                    | ⊕            | ⊖  | ⊖  | ⊕       |
| Genta et al, 2021 [ID# 79]                 | ⊖            | ⊖  | ⊖  | ⊖       |
| Giardino et al, 2020 [ID# 80]              | ⊕            | ⊖  | ⊖  | ⊕       |
| Goodman-Casanova et al, 2020 [ID# 81]      | ⊗            | ⊖  | ⊖  | ⊗       |
| Goularte et al, 2021 [ID# 82]              | ⊖            | ⊖  | ⊖  | ⊖       |
| Gu et al, 2020 [ID# 83]                    | ⊕            | ⊖  | ⊖  | ⊕       |
| Gualano et al, 2020 [ID# 84]               | ⊕            | ⊖  | ⊖  | ⊕       |
| Guo et al, 2020 [ID# 85]                   | ⊕            | ⊖  | ⊖  | ⊕       |
| Gupta et al, 2020 [ID# 86]                 | ⊕            | ⊖  | ⊖  | ⊖       |
| Hao et al, 2020 [ID# 87]                   | ⊕            | ⊖  | ⊖  | ⊖       |
| Haravuori et al, 2020 [ID# 88]             | ⊕            | ⊖  | ⊖  | ⊕       |
| He et al, 2021 [ID# 89]                    | ⊕            | ⊖  | ⊖  | ⊕       |
| Hendrickson et al, 2020 [ID# 90]           | ⊗            | ⊖  | ⊖  | ⊖       |
| Herrero San Martin et al, 2020 [ID# 91]    | ⊕            | ⊖  | ⊖  | ⊖       |
| Huang et al, 2020 [ID# 92]                 | ⊕            | ⊖  | ⊖  | ⊕       |
| Huang et al, 2020 [ID# 93]                 | ⊕            | ⊖  | ⊖  | ⊕       |
| Huang et al, 2020 [ID# 94]                 | ⊕            | ⊖  | ⊖  | ⊕       |
| Hussen et al, 2021 [ID# 95]                | ⊗            | ⊖  | ⊖  | ⊖       |
| Idrissi et al, 2020 [ID# 96]               | ⊕            | ⊖  | ⊖  | ⊕       |
| Innocenti et al, 2020 [ID# 97]             | ⊖            | ⊖  | ⊖  | ⊖       |
| Iqbal et al, 2020 [ID# 98]                 | ⊗            | ⊗  | ⊖  | ⊗       |
| Jahrami et al, 2020 [ID# 99]               | ⊕            | ⊖  | ⊖  | ⊕       |
| Jain et al, 2020 [ID# 100]                 | ⊕            | ⊖  | ⊖  | ⊕       |
| Jiang et al, 2021 [ID# 101]                | ⊕            | ⊖  | ⊖  | ⊕       |
| Jin et al, 2021 [ID# 102]                  | ⊖            | ⊖  | ⊖  | ⊖       |
| Juanjuan et al, 2020 [ID# 103]             | ⊕            | ⊖  | ⊖  | ⊕       |
| Jung et al, 2020 [ID# 104]                 | ⊗            | ⊖  | ⊖  | ⊖       |
| Kaparounaki et al, 2020 [ID# 105]          | ⊖            | ⊖  | ⊖  | ⊖       |
| Khaled et al, 2021 [ID# 106]               | ⊕            | ⊖  | ⊖  | ⊕       |
| Khalil et al, 2020 [ID# 107]               | ⊗            | ⊗  | ⊖  | ⊗       |
| Khamis et al, 2020 [ID# 108]               | ⊕            | ⊖  | ⊖  | ⊕       |
| Khanal et al, 2020 [ID# 109]               | ⊕            | ⊖  | ⊖  | ⊕       |
| Khoury et al, 2021 [ID# 110]               | ⊕            | ⊖  | ⊖  | ⊕       |
| Kilani et al, 2020 [ID# 111]               | ⊕            | ⊖  | ⊖  | ⊕       |
| Killgore et al, 2020 [ID# 112]             | ⊖            | ⊖  | ⊖  | ⊖       |
| Kocevska et al, 2020 [ID# 113]             | ⊕            | ⊖  | ⊖  | ⊕       |
| Kokou-Kpolou et al, 2020 [ID# 114]         | ⊖            | ⊖  | ⊖  | ⊖       |
| Kolokotroni et al, 2021 [ID# 115]          | ⊖            | ⊖  | ⊖  | ⊖       |
| Lahiri et al, 2021 [ID# 116]               | ⊕            | ⊖  | ⊖  | ⊕       |
| Lai et al, 2020 [ID# 117]                  | ⊕            | ⊖  | ⊖  | ⊕       |
| Lai et al, 2020 [ID# 118]                  | ⊖            | ⊖  | ⊖  | ⊖       |
| Lavigne-Cerván et al, 2021 [ID# 119]       | ⊕            | ⊖  | ⊖  | ⊖       |
| Li et al, 2021 [ID# 120]                   | ⊖            | ⊖  | ⊖  | ⊖       |
| Li et al, 2020 [ID# 121]                   | ⊗            | ⊖  | ⊖  | ⊖       |
| Li et al, 2021 [ID# 122]                   | ⊗            | ⊖  | ⊖  | ⊖       |
| Li et al, 2020 [ID# 123]                   | ⊖            | ⊖  | ⊖  | ⊖       |
| Li et al, 2021 [ID# 124]                   | ⊕            | ⊖  | ⊖  | ⊕       |
| Liang et al, 2020 [ID# 125]                | ⊕            | ⊖  | ⊖  | ⊕       |
| Liguori et al, 2020 [ID# 126]              | ⊗            | ⊖  | ⊖  | ⊖       |
| Lin et al, 2021 [ID# 127]                  | ⊖            | ⊖  | ⊖  | ⊖       |
| Liu et al, 2020 [ID# 128]                  | ⊖            | ⊖  | ⊖  | ⊖       |
| Liu et al, 2021 [ID# 129]                  | ⊕            | ⊖  | ⊖  | ⊕       |
| Liu et al, 2021 [ID# 130]                  | ⊕            | ⊖  | ⊖  | ⊕       |
| Liu et al, 2020 [ID# 131]                  | ⊕            | ⊖  | ⊖  | ⊕       |
| Liu et al, 2020 [ID# 132]                  | ⊕            | ⊖  | ⊖  | ⊕       |
| Lu et al, 2020 [ID# 133]                   | ⊕            | ⊖  | ⊖  | ⊕       |
| Machón et al, 2021 [ID# 134]               | ⊗            | ⊗  | ⊖  | ⊖       |
| Magnavita et al, 2020 [ID# 135]            | ⊖            | ⊖  | ⊖  | ⊖       |
| Majumdar et al, 2021 [ID# 136]             | ⊖            | ⊖  | ⊖  | ⊖       |
| Mandelkorn et al, 2021 [ID# 137]           | ⊕            | ⊖  | ⊖  | ⊕       |
| Marelli et al, 2020 [ID# 138]              | ⊕            | ⊖  | ⊖  | ⊕       |
| Marroquín et al, 2020 [ID# 139]            | ⊕            | ⊖  | ⊖  | ⊕       |
| Martínez-de-Quel et al, 2021 [ID# 140]     | ⊕            | ⊖  | ⊖  | ⊖       |
| Martínez-Lezaun et al, 2020 [ID# 141]      | ⊕            | ⊖  | ⊖  | ⊖       |
| Massicotte et al, 2021 [ID# 142]           | ⊖            | ⊗  | ⊖  | ⊖       |
| Mazza et al, 2020 [ID# 143]                | ⊕            | ⊖  | ⊖  | ⊕       |
| McCall et al, 2020 [ID# 144]               | ⊗            | ⊖  | ⊖  | ⊖       |
| McCracken et al, 2020 [ID# 145]            | ⊕            | ⊖  | ⊖  | ⊕       |
| Meo et al, 2021 [ID# 146]                  | ⊖            | ⊖  | ⊖  | ⊖       |
| Miaskowski et al, 2020 [ID# 147]           | ⊗            | ⊖  | ⊖  | ⊗       |
| Mongkhon et al, 2021 [ID# 148]             | ⊕            | ⊖  | ⊖  | ⊕       |
| Murata et al, 2020 [ID# 149]               | ⊗            | ⊗  | ⊗  | ⊖       |
| Necho et al, 2020 [ID# 150]                | ⊕            | ⊖  | ⊖  | ⊕       |
| Osiogo et al, 2021 [ID# 151]               | ⊗            | ⊖  | ⊖  | ⊖       |
| Ozluğ et al, 2021 [ID# 152]                | ⊖            | ⊖  | ⊖  | ⊖       |
| Parlapani et al, 2020 [ID# 153]            | ⊖            | ⊖  | ⊖  | ⊖       |
| Pedrozo-Pupo et al, 2020 [ID# 154]         | ⊕            | ⊖  | ⊖  | ⊕       |
| Petrov et al, 2021 [ID# 155]               | ⊕            | ⊖  | ⊖  | ⊕       |
| Pieh et al, 2020 [ID# 156]                 | ⊕            | ⊖  | ⊖  | ⊕       |
| Poyraz et al, 2021 [ID# 157]               | ⊕            | ⊖  | ⊖  | ⊕       |
| Qi et al, 2020 [ID# 158]                   | ⊕            | ⊖  | ⊖  | ⊕       |
| Que et al, 2020 [ID# 159]                  | ⊕            | ⊖  | ⊖  | ⊕       |
| Ren et al, 2020 [ID# 160]                  | ⊕            | ⊖  | ⊖  | ⊕       |
| Repon et al, 2021 [ID# 161]                | ⊖            | ⊖  | ⊖  | ⊖       |
| Robillard et al, 2020 [ID# 162]            | ⊕            | ⊖  | ⊖  | ⊕       |
| Rossi et al, 2020 [ID# 163]                | ⊕            | ⊖  | ⊖  | ⊕       |
| Rossi et al, 2020 [ID# 164]                | ⊕            | ⊖  | ⊖  | ⊕       |
| Roy et al, 2020 [ID# 165]                  | ⊗            | ⊖  | ⊖  | ⊖       |
| Saadeh et al, 2021 [ID# 166]               | ⊕            | ⊖  | ⊖  | ⊕       |
| Sadeghniaat-Haghighi et al, 2020 [ID# 167] | ⊕            | ⊖  | ⊖  | ⊖       |
| Sagaon-Teyssier et al, 2020 [ID# 168]      | ⊗            | ⊖  | ⊖  | ⊖       |
| Sagherian et al, 2020 [ID# 169]            | ⊕            | ⊖  | ⊖  | ⊕       |
| Saguem et al, 2021 [ID# 170]               | ⊕            | ⊖  | ⊖  | ⊕       |
| ..ahin et al, 2020 [ID# 171]               | ⊕            | ⊖  | ⊖  | ⊕       |
| Salfi et al, 2021 [ID# 172]                | ⊕            | ⊖  | ⊖  | ⊕       |
| Sañudo et al, 2020 [ID# 173]               | ⊗            | ⊗  | ⊗  | ⊖       |
| Saracoglu et al, 2020 [ID# 174]            | ⊕            | ⊖  | ⊖  | ⊖       |
| Saraswathi et al, 2020 [ID# 175]           | ⊕            | ⊖  | ⊖  | ⊖       |
| Scotta et al, 2020 [ID# 176]               | ⊕            | ⊖  | ⊖  | ⊕       |
| Sekartaji et al, 2021 [ID# 177]            | ⊗            | ⊗  | ⊖  | ⊗       |
| Sharma et al, 2020 [ID# 178]               | ⊗            | ⊖  | ⊖  | ⊖       |
| Sharma et al, 2021 [ID# 179]               | ⊗            | ⊖  | ⊖  | ⊗       |
| Sharma et al, 2020 [ID# 180]               | ⊕            | ⊖  | ⊖  | ⊖       |
| Shi et al, 2020 [ID# 181]                  | ⊕            | ⊖  | ⊖  | ⊕       |
| Shillington et al, 2021 [ID# 182]          | ⊖            | ⊖  | ⊖  | ⊖       |
| Simonetti et al, 2021 [ID# 183]            | ⊖            | ⊖  | ⊖  | ⊖       |
| Song et al, 2020 [ID# 184]                 | ⊕            | ⊖  | ⊖  | ⊕       |
| Stanton et al, 2020 [ID# 185]              | ⊗            | ⊖  | ⊖  | ⊖       |
| Stewart et al, 2021 [ID# 186]              | ⊕            | ⊖  | ⊖  | ⊖       |
| Sun et al, 2020 [ID# 187]                  | ⊗            | ⊖  | ⊖  | ⊖       |
| Sunil et al, 2021 [ID# 188]                | ⊕            | ⊖  | ⊖  | ⊕       |
| Tan Wanqiu et al, 2020 [ID# 189]           | ⊕            | ⊖  | ⊖  | ⊕       |
| Tang et al, 2020 [ID# 190]                 | ⊗            | ⊖  | ⊖  | ⊖       |
| Than et al, 2020 [ID# 191]                 | ⊕            | ⊖  | ⊖  | ⊖       |
| Tiete et al, 2020 [ID# 192]                | ⊖            | ⊖  | ⊖  | ⊖       |
| Totskiy et al, 2021 [ID# 193]              | ⊗            | ⊗  | ⊖  | ⊖       |
| Trabelsi et al, 2021 [ID# 194]             | ⊖            | ⊖  | ⊖  | ⊖       |
| Trabelsi et al, 2021 [ID# 195]             | ⊕            | ⊖  | ⊖  | ⊕       |
| Tselebis et al, 2020 [ID# 196]             | ⊕            | ⊖  | ⊖  | ⊖       |
| Tu et al, 2020 [ID# 197]                   | ⊖            | ⊖  | ⊖  | ⊖       |
| Varma et al, 2021 [ID# 198]                | ⊕            | ⊖  | ⊖  | ⊕       |
| Vitale et al, 2020 [ID# 199]               | ⊗            | ⊗  | ⊗  | ⊗       |
| Voitaidis et al, 2020 [ID# 200]            | ⊖            | ⊖  | ⊖  | ⊖       |
| Wang et al, 2021 [ID# 201]                 | ⊖            | ⊖  | ⊖  | ⊖       |
| Wang et al, 2020 [ID# 202]                 | ⊖            | ⊖  | ⊖  | ⊖       |
| Wang et al, 2021 [ID# 203]                 | ⊗            | ⊖  | ⊖  | ⊖       |
| Wang et al, 2020 [ID# 204]                 | ⊕            | ⊖  | ⊖  | ⊕       |
| Wang et al, 2021 [ID# 205]                 | ⊕            | ⊖  | ⊖  | ⊕       |
| Wang et al, 2020 [ID# 206]                 | ⊕            | ⊖  | ⊖  | ⊕       |
| Wang et al, 2020 [ID# 207]                 | ⊕            | ⊖  | ⊖  | ⊕       |
| Wang et al, 2020 [ID# 208]                 | ⊕            | ⊖  | ⊖  | ⊕       |
| Wang et al, 2020 [ID# 209]                 | ⊕            |    |    |         |
