# Supplementary material
Source: PubMed Central journal article supplement (PMC8782754)
Supplement: mmc7.pdf [file mmc7.pdf]

■ quoted estimate ← shrinkage estimate

| study                                     | estimate | 95% CI            |
|-------------------------------------------|----------|-------------------|
| Abbas et al, 2021 [ID# 1]                 | 3.7174   | [2.6845, 5.1477]  |
| Abdellah et al, 2021 [ID# 2]              | 2.4747   | [1.9596, 3.1254]  |
| Abdulah et al, 2020 [ID# 3]               | 2.1529   | [1.6646, 2.7846]  |
| Agberotimi et al, 2020 [ID# 4]            | 0.2981   | [0.2548, 0.3487]  |
| Ahmad et al, 2020 [ID# 5]                 | 0.1772   | [0.1343, 0.2337]  |
| Akinci et al, 2021 [ID# 6]                | 1.1724   | [0.8808, 1.5606]  |
| Al Ammari et al, 2021 [ID# 7]             | 0.1650   | [0.1339, 0.2035]  |
| Al Maqbali et al, 2021 [ID# 8]            | 2.8047   | [2.4568, 3.2020]  |
| Al-Ajlouni et al, 2020 [ID# 9]            | 0.2181   | [0.1886, 0.2521]  |
| Alamrawy et al, 2021 [ID# 10]             | 2.8205   | [2.2842, 3.4827]  |
| AlAtaeeq et al, 2021 [ID# 11]             | 2.0394   | [1.8176, 2.2882]  |
| Alessi et al, 2020 [ID# 12]               | 3.4444   | [2.2441, 5.2869]  |
| Alfonsi et al, 2021 [ID# 13].1            | 0.9607   | [0.8429, 1.0950]  |
| Alfonsi et al, 2021 [ID# 13].2            | 1.0472   | [0.8025, 1.3665]  |
| Alharbi et al, 2021 [ID# 14].1            | 1.2443   | [1.0814, 1.4317]  |
| Alharbi et al, 2021 [ID# 14].2            | 1.1944   | [1.0384, 1.3740]  |
| Ali et al, 2021 [ID# 15]                  | 0.7927   | [0.6297, 0.9978]  |
| Almater et al, 2020 [ID# 16]              | 0.8136   | [0.5558, 1.1908]  |
| Alnofaiey et al, 2020 [ID# 17]            | 0.7838   | [0.6522, 0.9419]  |
| Alomayri et al, 2020 [ID# 18]             | 0.4652   | [0.3769, 0.5742]  |
| Alqahyani et al, 2021 [ID# 19]            | 0.5483   | [0.4634, 0.6488]  |
| AlRasheed et al, 2021 [ID# 20]            | 4.1343   | [3.1661, 5.3987]  |
| Alshekaili et al, 2020 [ID# 21]           | 0.2274   | [0.1958, 0.2640]  |
| Ammar et al, 2020 [ID# 22].1              | 1.0733   | [0.9507, 1.2116]  |
| Ammar et al, 2020 [ID# 22].2              | 1.8145   | [1.5988, 2.0593]  |
| Amra et al, 2021 [ID# 23].1               | 3.6500   | [2.9802, 4.6742]  |
| Amra et al, 2021 [ID# 23].2               | 0.5436   | [0.4394, 0.6724]  |
| Assenza et al, 2020 [ID# 24]              | 0.8054   | [0.7077, 0.9167]  |
| Atas et al, 2021 [ID# 25].1               | 0.9273   | [0.6335, 1.3573]  |
| Atas et al, 2021 [ID# 25].2               | 0.6061   | [0.4092, 0.8976]  |
| Bacaro et al, 2020 [ID# 26]               | 0.2285   | [0.2041, 0.2559]  |
| Badellino et al, 2020 [ID# 27]            | 0.3008   | [0.2710, 0.3339]  |
| Bai et al, 2020 [ID# 28]                  | 0.6164   | [0.4252, 0.8938]  |
| Bajaj et al, 2020 [ID# 29]                | 1.1484   | [0.9414, 1.4008]  |
| Barrea et al, 2020 [ID# 30].1             | 1.0167   | [0.7119, 1.4519]  |
| Barrea et al, 2020 [ID# 30].2             | 4.2609   | [2.7057, 6.7099]  |
| Barua et al, 2021 [ID# 31]                | 0.2292   | [0.1765, 0.2978]  |
| Baskan et al, 2021 [ID# 32]               | 2.5221   | [2.2833, 2.7860]  |
| Beck et al, 2020 [ID# 33]                 | 2.8506   | [2.4757, 3.2822]  |
| Benham et al, 2020 [ID# 34]               | 1.7773   | [1.5813, 1.9975]  |
| Bezerra et al, 2020 [ID# 35]              | 1.7322   | [1.6221, 1.8498]  |
| Bhat et al, 2020 [ID# 36]                 | 1.1120   | [0.8733, 1.4159]  |
| Bigalke et al, 2020 [ID# 37].1            | 1.9429   | [1.2923, 2.9209]  |
| Bigalke et al, 2020 [ID# 37].2            | 0.9074   | [0.6164, 1.3358]  |
| Blekas et al, 2020 [ID# 38]               | 0.5517   | [0.4300, 0.7078]  |
| Bohken et al, 2020 [ID# 39]               | 0.2185   | [0.1690, 0.2824]  |
| Brito-Marques et al, 2021 [ID# 40].1      | 2.7727   | [2.1730, 3.5379]  |
| Brito-Marques et al, 2021 [ID# 40].2      | 4.1875   | [3.1881, 5.5002]  |
| Caballero-Dominguez et al, 2020 [ID# 41]  | 0.7241   | [0.6232, 0.8414]  |
| Cai et al, 2020 [ID# 42]                  | 0.6247   | [0.5748, 0.6788]  |
| Cai et al, 2020 [ID# 43]                  | 0.6440   | [0.5769, 0.7190]  |
| Casagrande et al, 2020 [ID# 44]           | 1.3306   | [1.2250, 1.4454]  |
| Cellini et al, 2021 [ID# 45].1            | 0.6989   | [0.5551, 0.8799]  |
| Cellini et al, 2021 [ID# 45].2            | 0.8457   | [0.6736, 1.0617]  |
| Cellini et al, 2020 [ID# 46]              | 1.0994   | [0.9864, 1.2253]  |
| Cellini et al, 2021 [ID# 47]              | 1.1762   | [1.0831, 1.2774]  |
| Chatterjee et al, 2021 [ID# 48]           | 0.9178   | [0.6588, 1.2787]  |
| Chen et al, 2021 [ID# 49]                 | 0.1730   | [0.1429, 0.2095]  |
| Cheng et al, 2020 [ID# 50]                | 0.4278   | [0.3555, 0.5148]  |
| Cheng et al, 2021 [ID# 51]                | 0.3229   | [0.2934, 0.3553]  |
| Chi et al, 2021 [ID# 52]                  | 0.6075   | [0.5522, 0.6684]  |
| Chouchou et al, 2021 [ID# 53]             | 0.2903   | [0.2296, 0.3671]  |
| Coiro et al, 2021 [ID# 54]                | 1.2728   | [1.1769, 1.3765]  |
| Cui et al, 2020 [ID# 55]                  | 0.6939   | [0.6072, 0.7930]  |
| Czeisler et al, 2021 [ID# 56]             | 0.2209   | [0.1939, 0.2516]  |
| Dai et al, 2020 [ID# 57]                  | 5.5319   | [4.0547, 7.5473]  |
| Das et al, 2021 [ID# 58]                  | 2.7753   | [2.3383, 3.2940]  |
| Dasdemir et al, 2021 [ID# 59]             | 0.9130   | [0.5053, 1.6497]  |
| de Medeiros et al, 2021 [ID# 60]          | 4.0000   | [0.4471, 35.7876] |
| Demartini et al, 2020 [ID# 61]            | 1.3607   | [1.1243, 1.6468]  |
| Du et al, 2021 [ID# 62]                   | 1.4851   | [1.3652, 1.6156]  |
| Duran et al, 2021 [ID# 63]                | 1.2253   | [1.0474, 1.4903]  |
| Elhadi et al, 2021 [ID# 64]               | 0.2339   | [0.2227, 0.2458]  |
| ElHafeez et al, 2021 [ID# 65].1           | 2.3723   | [1.9429, 2.8965]  |
| ElHafeez et al, 2021 [ID# 65].2           | 2.0056   | [1.6763, 2.3995]  |
| Elkholy et al, 2021 [ID# 66]              | 0.3316   | [0.2708, 0.4059]  |
| Essangri et al, 2021 [ID# 67]             | 1.6780   | [1.4116, 1.9948]  |
| Falkingham et al, 2020 [ID# 68]           | 0.2584   | [0.2485, 0.2687]  |
| Fekih-Romdhane et al, 2020 [ID# 69]       | 0.7073   | [0.5375, 0.9308]  |
| Fidanci et al, 2020 [ID# 70]              | 3.2500   | [2.2369, 4.7219]  |
| Filippo et al, 2021 [ID# 71]              | 2.1818   | [1.5857, 3.0021]  |
| Florin et al, 2020 [ID# 72]               | 0.1400   | [0.1200, 0.1632]  |
| Franceschini et al, 2020 [ID# 73]         | 1.2381   | [1.1787, 1.3004]  |
| Fu et al, 2020 [ID# 74]                   | 0.4392   | [0.3892, 0.4955]  |
| Garcia-Priego et al, 2020 [ID# 75]        | 0.9964   | [0.8445, 1.1758]  |
| Garriga-Baraut et al, 2021 [ID# 76]       | 2.5714   | [1.0740, 6.1564]  |
| Gas et al, 2021 [ID# 77]                  | 0.0240   | [0.0120, 0.0349]  |
| Ge et al, 2020 [ID# 78]                   | 0.2030   | [0.1806, 0.2281]  |
| Genta et al, 2021 [ID# 79]                | 2.3571   | [1.5150, 3.6674]  |
| Giardino et al, 2020 [ID# 80]             | 2.7957   | [2.4384, 3.2053]  |
| Goodman-Casanova et al, 2020 [ID# 81]     | 0.3099   | [0.1921, 0.4999]  |
| Goularte et al, 2021 [ID# 82]             | 1.2377   | [1.1331, 1.3518]  |
| Gu et al, 2020 [ID# 83]                   | 0.1730   | [0.1359, 0.2204]  |
| Gualano et al, 2020 [ID# 84]              | 0.7003   | [0.6322, 0.7758]  |
| Guo et al, 2020 [ID# 85]                  | 0.2589   | [0.2347, 0.2856]  |
| Gupta et al, 2020 [ID# 86].1              | 0.0557   | [0.0355, 0.0874]  |
| Gupta et al, 2020 [ID# 86].2              | 0.1221   | [0.0940, 0.1586]  |
| Hao et al, 2020 [ID# 87]                  | 0.1420   | [0.0917, 0.2197]  |
| Haravuoni et al, 2020 [ID# 88]            | 0.7114   | [0.6718, 0.7534]  |
| He et al, 2021 [ID# 89].1                 | 0.3123   | [0.2461, 0.3962]  |
| He et al, 2021 [ID# 89].2                 | 0.4240   | [0.3425, 0.5250]  |
| He et al, 2021 [ID# 89].3                 | 0.2140   | [0.1902, 0.2407]  |
| Hendrickson et al, 2020 [ID# 90]          | 0.3882   | [0.2597, 0.5803]  |
| Herrero San Martin et al, 2020 [ID# 91].1 | 1.3256   | [0.8922, 1.9694]  |
| Herrero San Martin et al, 2020 [ID# 91].2 | 0.5217   | [0.3185, 0.8547]  |
| Huang et al, 2020 [ID# 92]                | 1.5288   | [1.3438, 1.7392]  |
| Huang et al, 2020 [ID# 93]                | 0.3273   | [0.2866, 0.3738]  |
| Huang et al, 2020 [ID# 94]                | 0.2225   | [0.2096, 0.2362]  |
| Hussen et al, 2021 [ID# 95]               | 0.4747   | [0.3754, 0.6001]  |
| Idrissi et al, 2020 [ID# 96]              | 1.2720   | [1.1088, 1.4592]  |
| Innocenti et al, 2020 [ID# 97]            | 1.0909   | [0.9657, 1.2324]  |
| Iqbal et al, 2020 [ID# 98]                | 2.3333   | [1.2744, 4.2723]  |
| Jahrami et al, 2020 [ID# 99]              | 2.8939   | [2.1875, 3.8285]  |
| Jain et al, 2020 [ID# 100]                | 1.5347   | [1.2854, 1.8322]  |
| Jiang et al, 2021 [ID# 101]               | 0.5911   | [0.5554, 0.6290]  |
| Jin et al, 2021 [ID# 102]                 | 0.3333   | [0.2661, 0.4175]  |
| Juanjuan et al, 2020 [ID# 103]            | 1.1294   | [0.9691, 1.3163]  |
| Jung et al, 2020 [ID# 104]                | 0.8283   | [0.7753, 0.8849]  |
| Kaparounaki et al, 2020 [ID# 105]         | 0.7544   | [0.6656, 0.8550]  |
| Khaled et al, 2021 [ID# 106]              | 0.0830   | [0.0669, 0.1031]  |
| Khalil et al, 2020 [ID# 107]              | 0.5091   | [0.3230, 0.8024]  |
| Khamis et al, 2020 [ID# 108]              | 0.6475   | [0.5301, 0.7910]  |
| Khanal et al, 2020 [ID# 109]              | 0.5127   | [0.4240, 0.6200]  |
| Khoury et al, 2021 [ID# 110]              | 0.6467   | [0.5136, 0.8144]  |
| Kilani et al, 2020 [ID# 111]              | 0.7457   | [0.6778, 0.8204]  |
| Killgore et al, 2020 [ID# 112]            | 1.2764   | [1.1275, 1.4450]  |
| Kocevska et al, 2020 [ID# 113]            | 2.0181   | [1.7176, 2.3712]  |
| Kokou-Kpolou et al, 2020 [ID# 114]        | 0.2356   | [0.1906, 0.2911]  |
| Kolokotroni et al, 2021 [ID# 115]         | 0.6779   | [0.5856, 0.7848]  |
| Lahiri et al, 2021 [ID# 116]              | 0.6917   | [0.6127, 0.7809]  |
| Lai et al, 2020 [ID# 117]                 | 0.5145   | [0.4578, 0.5782]  |
| Lai et al, 2020 [ID# 118]                 | 0.2157   | [0.1361, 0.3419]  |
| Lavigne-Cerván et al, 2021 [ID# 119]      | 2.8074   | [2.4433, 3.2258]  |
| Li et al, 2021 [ID# 120]                  | 3.1081   | [2.6336, 3.6681]  |
| Li et al, 2020 [ID# 121]                  | 1.2618   | [1.1544, 1.3791]  |
| Li et al, 2021 [ID# 122]                  | 0.3421   | [0.1822, 0.6422]  |
| Li et al, 2020 [ID# 123]                  | 0.4709   | [0.3970, 0.5585]  |
| Li et al, 2021 [ID# 124]                  | 1.3210   | [1.1700, 1.4915]  |
| Liang et al, 2020 [ID# 125].1             | 0.7559   | [0.6624, 0.8625]  |
| Liang et al, 2020 [ID# 125].2             | 0.4413   | [0.3882, 0.5015]  |
| Liguori et al, 2020 [ID# 126]             | 0.9808   | [0.6665, 1.4432]  |
| Lin et al, 2021 [ID# 127]                 | 0.2612   | [0.2447, 0.2789]  |
| Liu et al, 2020 [ID# 128]                 | 0.2611   | [0.1960, 0.3477]  |
| Liu et al, 2021 [ID# 129]                 | 0.5218   | [0.4771, 0.5707]  |
| Liu et al, 2021 [ID# 130]                 | 0.2442   | [0.2227, 0.2678]  |
| Liu et al, 2020 [ID# 131]                 | 0.4709   | [0.3970, 0.5585]  |
| Liu et al, 2020 [ID# 132]                 | 0.0716   | [0.0551, 0.0930]  |
| Liu et al, 2020 [ID# 133]                 | 0.5366   | [0.4701, 0.6126]  |
| Machón et al, 2021 [ID# 134]              | 1.9231   | [0.9839, 3.7589]  |
| Magnavita et al, 2020 [ID# 135]           | 0.5789   | [0.3771, 0.8889]  |
| Majumdar et al, 2021 [ID# 136].1          | 0.5116   | [0.4066, 0.6438]  |
| Majumdar et al, 2021 [ID# 136].2          | 0.2378   | [0.1677, 0.3372]  |
| Mandelkorn et al, 2021 [ID# 137].1        | 0.7559   | [0.6657, 0.8583]  |
| Mandelkorn et al, 2021 [ID# 137].2        | 0.5241   | [0.4831, 0.5686]  |
| Marelli et al, 2020 [ID# 138].1           | 2.7439   | [2.1309, 3.5332]  |
| Marelli et al, 2020 [ID# 138].2           | 0.1946   | [0.1437, 0.2634]  |
| Marelli et al, 2020 [ID# 138].3           | 1.3798   | [1.1000, 1.7308]  |
| Marelli et al, 2020 [ID# 138].4           | 0.0734   | [0.0471, 0.1144]  |
| Marelli et al, 2020 [ID# 138].5           | 1.5135   | [0.9992, 2.2926]  |
| Marelli et al, 2020 [ID# 138].6           | 0.1481   | [0.0808, 0.2716]  |
| Marelli et al, 2020 [ID# 138].7           | 0.9375   | [0.6242, 1.4080]  |
| Marelli et al, 2020 [ID# 138].8           | 0.0449   | [0.0165, 0.1224]  |
| Marroquin et al, 2020 [ID# 139]           | 0.6292   | [0.5198, 0.7632]  |
| Martínez-de-Quiel et al, 2021 [ID# 140].1 | 1.7288   | [1.2546, 2.3822]  |
| Martínez-de-Quiel et al, 2021 [ID# 140].2 | 3.0250   | [2.1158, 4.3249]  |
| Martínez-Lezaun et al, 2020 [ID# 141].1   | 2.1250   | [1.5678, 3.4519]  |
| Martínez-Lezaun et al, 2020 [ID# 141].2   | 2.4000   | [1.5076, 3.6744]  |
| Massicotte et al, 2021 [ID# 142]          | 0.7143   | [0.3682, 1.3856]  |
| Mazza et al, 2020 [ID# 143]               | 0.6612   | [0.5415, 0.8073]  |
| McCall et al, 2020 [ID# 144]              | 1.7951   | [1.5132, 2.1295]  |
| McCracken et al, 2020 [ID# 145]           | 0.8997   | [0.8038, 1.0071]  |
| Meo et al, 2021 [ID# 146]                 | 4.5563   | [4.0227, 5.1606]  |
| Miaskowski et al, 2020 [ID# 147]          | 1.4933   | [1.1147, 2.0006]  |
| Mongkhon et al, 2021 [ID# 148]            | 1.1678   | [1.0975, 1.2427]  |
| Murata et al, 2020 [ID# 149].1            | 1.2510   | [1.0624, 1.4730]  |
| Murata et al, 2020 [ID# 149].2            | 0.8833   | [0.8321, 0.9377]  |
| Necho et al, 2020 [ID# 150]               | 2.0876   | [1.7030, 2.5591]  |
| Osiogo et al, 2021 [ID# 151]              | 3.5048   | [3.2985, 3.7241]  |
| Oziuk et al, 2021 [ID# 152]               | 0.7987   | [0.6381, 0.9748]  |
| Parlapani et al, 2020 [ID# 153]           | 0.6094   | [0.4092, 0.9074]  |
| Pedrozo-Pupo et al, 2020 [ID# 154]        | 1.3740   | [1.0892, 1.7333]  |
| Petrov et al, 2021 [ID# 155]              | 0.7665   | [0.6760, 0.8691]  |
| Pieh et al, 2020 [ID# 156]                | 0.1865   | [0.1574, 0.2211]  |
| Poyraz et al, 2021 [ID# 157]              | 0.5519   | [0.4329, 0.7037]  |
| Qi et al, 2020 [ID# 158]                  | 0.8343   | [0.7482, 0.9303]  |
| Que et al, 2020 [ID# 159]                 | 0.0728   | [0.0618, 0.0857]  |
| Ren et al, 2020 [ID# 160]                 | 0.7772   | [0.0618, 0.0964]  |
| Repon et al, 2021 [ID# 161]               | 6.7174   | [4.9281, 9.1563]  |
| Robillard et al, 2020 [ID# 162]           | 0.9910   | [0.9401, 1.0447]  |
| Rossi et al, 2020 [ID# 163].1             | 0.0846   | [0.0805, 0.0890]  |
| Rossi et al, 2020 [ID# 163].2             | 0.0907   | [0.0791, 0.1039]  |
| Roy et al, 2020 [ID# 164]                 | 0.0772   | [0.0730, 0.0817]  |
| Roy et al, 2020 [ID# 165]                 | 0.1434   | [0.1139, 0.1804]  |
| Sadeh et al, 2020 [ID# 166]               | 3.1689   | [2.9886, 3.3595]  |
| Sadeghnia-Haghghi et al, 2020 [ID# 167]   | 2.1318   | [1.1005, 3.3787]  |
| Sagaon-Teyssier et al, 2020 [ID# 168]     | 3.3548   | [2.2464, 5.0102]  |
| Sagherian et al, 2020 [ID# 169]           | 0.8312   | [0.7042, 0.9810]  |
| Saguem et al, 2021 [ID# 170]              | 2.6377   | [1.9993, 3.4799]  |
| Şahin et al, 2020 [ID# 171]               | 1.0150   | [0.8931, 1.1535]  |
| Salfi et al, 2021 [ID# 172].1             | 1.3566   | [1.3119, 1.4029]  |
| Salfi et al, 2021 [ID# 172].2             | 0.1761   | [0.1681, 0.1845]  |
| Sañudo et al, 2020 [ID# 173]              | 0.8182   | [0.3390, 1.9744]  |
| Saracoglu et al, 2020 [ID# 174]           | 0.8407   | [0.6400, 1.1044]  |
| Saraswathi et al, 2020 [ID# 175]          | 0.5282   | [0.3993, 0.6987]  |
| Scotta et al, 2020 [ID# 176]              | 0.3677   | [0.3062, 0.4415]  |
| Sekartaji et al, 2021 [ID# 177]           | 0.1222   | [0.0654, 0.2286]  |
| Sharma et al, 2020 [ID# 178]              | 0.2830   | [0.2033, 0.3940]  |
| Sharma et al, 2021 [ID# 179]              | 0.4286   | [0.2794, 0.6573]  |
| Sharma et al, 2020 [ID# 180]              | 0.1084   | [0.0667, 0.1764]  |
| Shi et al, 2020 [ID# 181]                 | 0.0609   | [0.0588, 0.0631]  |
| Shillington et al, 2021 [ID# 182]         | 1.7747   | [1.6265, 1.9364]  |
| Simonetti et al, 2021 [ID# 183]           | 3.1189   | [2.7001, 3.6026]  |
| Song et al, 2020 [ID# 184]                | 0.2616   | [0.2181, 0.3136]  |
| Stanton et al, 2020 [ID# 185]             | 0.6867   | [0.6193, 0.7614]  |
| St                                        |          |                   |
