# Supplementary material
Source: PubMed Central journal article supplement (PMC8782754)
Supplement: mmc8.pdf [file mmc8.pdf]

Study, Number, Total, Prevalence (%), 95%CI, Events per 100 observations. Includes sub-analyses for Country = Others, India, Turkey, Saudi Arabia, Italy, China, USA, and Spain. Heterogeneity statistics are provided for each group and the overall model.
