# Supplementary material
Source: PubMed Central journal article supplement (PMC8782754)
Supplement: mmc10.pdf [file mmc10.pdf]

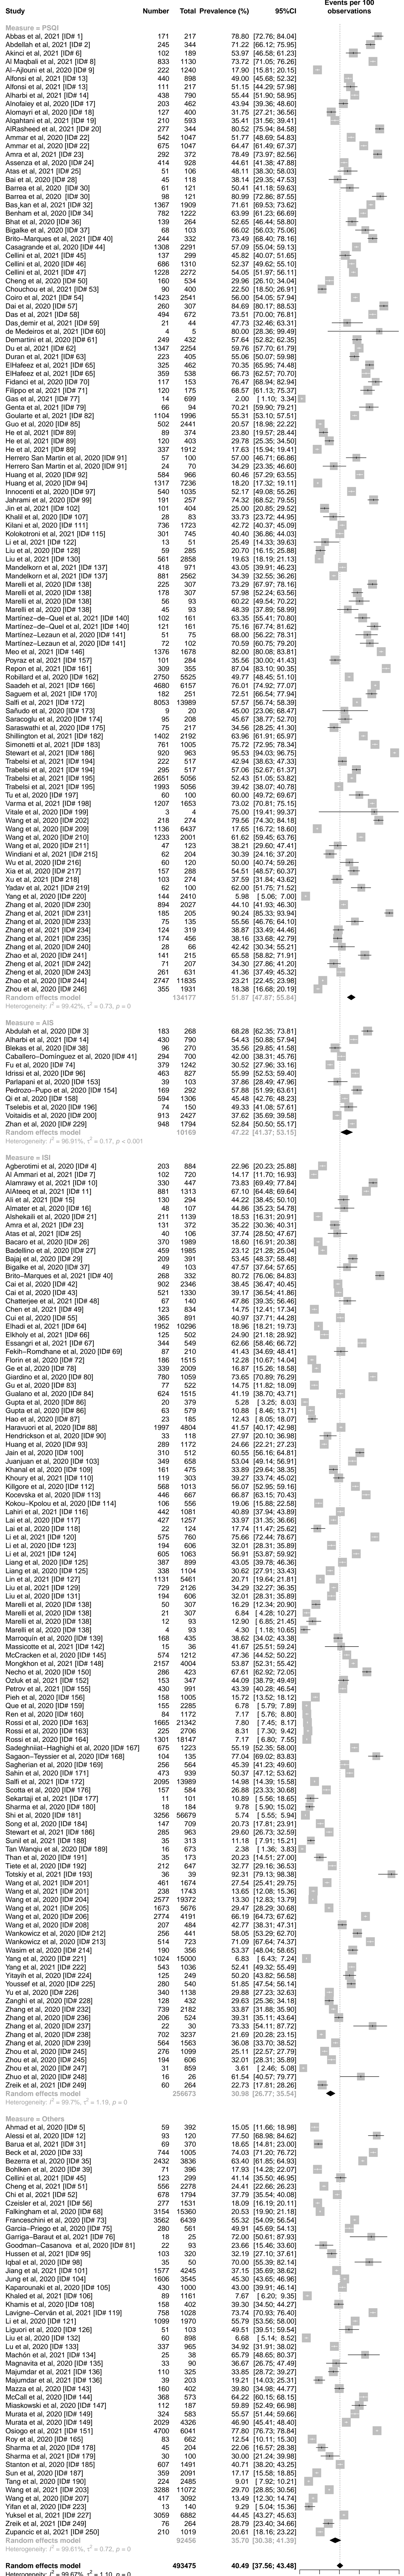

Events per 100 observations

Measure = PSQI

| Study                                   | Number | Total  | Prevalence (%) | 95%CI          |
|-----------------------------------------|--------|--------|----------------|----------------|
| Abbas et al, 2021 [ID# 1]               | 171    | 217    | 78.80          | [72.76; 84.04] |
| Abdellah et al, 2021 [ID# 2]            | 245    | 344    | 71.22          | [66.12; 75.95] |
| Akinci et al, 2021 [ID# 6]              | 102    | 189    | 53.97          | [46.58; 61.23] |
| Al Maqbali et al, 2021 [ID# 8]          | 833    | 1130   | 73.72          | [71.05; 76.26] |
| Al-Ajlouni et al, 2020 [ID# 9]          | 222    | 1240   | 17.90          | [15.81; 20.15] |
| Alfonsi et al, 2021 [ID# 13]            | 440    | 898    | 49.00          | [45.68; 52.32] |
| Alfonsi et al, 2021 [ID# 13]            | 111    | 217    | 51.15          | [44.29; 57.98] |
| Alharbi et al, 2021 [ID# 14]            | 438    | 790    | 55.44          | [51.90; 58.95] |
| Alnofaiey et al, 2020 [ID# 17]          | 203    | 462    | 43.94          | [39.36; 48.60] |
| Alomayri et al, 2020 [ID# 18]           | 127    | 400    | 31.75          | [27.21; 36.56] |
| Alqahtani et al, 2021 [ID# 19]          | 210    | 593    | 35.41          | [31.56; 39.41] |
| AlRasheed et al, 2021 [ID# 20]          | 277    | 344    | 80.52          | [75.94; 84.58] |
| Ammar et al, 2020 [ID# 22]              | 542    | 1047   | 51.77          | [48.69; 54.83] |
| Ammar et al, 2020 [ID# 22]              | 675    | 1047   | 64.47          | [61.49; 67.37] |
| Amra et al, 2021 [ID# 23]               | 292    | 372    | 78.49          | [73.97; 82.56] |
| Assenza et al, 2020 [ID# 24]            | 414    | 928    | 44.61          | [41.38; 47.88] |
| Atas et al, 2021 [ID# 25]               | 51     | 106    | 48.11          | [38.30; 58.03] |
| Bai et al, 2020 [ID# 28]                | 45     | 118    | 38.14          | [29.35; 47.53] |
| Barrea et al, 2020 [ID# 30]             | 61     | 121    | 50.41          | [41.18; 59.63] |
| Barrea et al, 2020 [ID# 30]             | 98     | 121    | 80.99          | [72.86; 87.55] |
| Bas,kan et al, 2021 [ID# 32]            | 1367   | 1909   | 71.61          | [69.53; 73.62] |
| Benham et al, 2020 [ID# 34]             | 782    | 1222   | 63.99          | [61.23; 66.69] |
| Bhat et al, 2020 [ID# 36]               | 139    | 264    | 52.65          | [46.44; 58.80] |
| Bigalke et al, 2020 [ID# 37]            | 68     | 103    | 66.02          | [56.03; 75.06] |
| Brito-Marques et al, 2021 [ID# 40]      | 244    | 332    | 73.49          | [68.40; 78.16] |
| Casagrande et al, 2020 [ID# 44]         | 1308   | 2291   | 57.09          | [55.04; 59.13] |
| Cellini et al, 2021 [ID# 45]            | 137    | 299    | 45.82          | [40.07; 51.65] |
| Cellini et al, 2020 [ID# 46]            | 686    | 1310   | 52.37          | [49.62; 55.10] |
| Cellini et al, 2021 [ID# 47]            | 1228   | 2272   | 54.05          | [51.97; 56.11] |
| Cheng et al, 2020 [ID# 50]              | 160    | 534    | 29.96          | [26.10; 34.04] |
| Chouchou et al, 2021 [ID# 53]           | 90     | 400    | 22.50          | [18.50; 26.91] |
| Coiro et al, 2021 [ID# 54]              | 1423   | 2541   | 56.00          | [54.05; 57.94] |
| Dai et al, 2020 [ID# 57]                | 260    | 307    | 84.69          | [80.17; 88.53] |
| Das et al, 2021 [ID# 58]                | 494    | 672    | 73.51          | [70.00; 76.81] |
| Das, demir et al, 2021 [ID# 59]         | 21     | 44     | 47.73          | [32.46; 63.31] |
| de Medeiros et al, 2021 [ID# 60]        | 4      | 5      | 80.00          | [28.36; 99.49] |
| Demartini et al, 2020 [ID# 61]          | 249    | 432    | 57.64          | [52.82; 62.35] |
| Du et al, 2021 [ID# 62]                 | 1347   | 2254   | 59.76          | [57.70; 61.79] |
| Duran et al, 2021 [ID# 63]              | 223    | 405    | 55.06          | [50.07; 59.98] |
| ElHafeez et al, 2021 [ID# 65]           | 325    | 462    | 70.35          | [65.95; 74.48] |
| ElHafeez et al, 2021 [ID# 65]           | 359    | 538    | 66.73          | [62.57; 70.70] |
| Fidanci et al, 2020 [ID# 70]            | 117    | 153    | 76.47          | [68.94; 82.94] |
| Filippo et al, 2021 [ID# 71]            | 120    | 175    | 68.57          | [61.13; 75.37] |
| Gas et al, 2021 [ID# 77]                | 14     | 699    | 2.00           | [1.10; 3.34]   |
| Genta et al, 2021 [ID# 79]              | 66     | 94     | 70.21          | [59.90; 79.21] |
| Goularte et al, 2021 [ID# 82]           | 1104   | 1996   | 55.31          | [53.10; 57.51] |
| Guo et al, 2020 [ID# 85]                | 502    | 2441   | 20.57          | [18.98; 22.22] |
| He et al, 2021 [ID# 89]                 | 89     | 374    | 23.80          | [19.57; 28.44] |
| He et al, 2021 [ID# 89]                 | 120    | 403    | 29.78          | [25.35; 34.50] |
| He et al, 2021 [ID# 89]                 | 337    | 1912   | 17.63          | [15.94; 19.41] |
| Herrero San Martin et al, 2020 [ID# 91] | 57     | 100    | 57.00          | [46.71; 66.86] |
| Herrero San Martin et al, 2020 [ID# 91] | 24     | 70     | 34.29          | [23.35; 46.60] |
| Huang et al, 2020 [ID# 92]              | 584    | 966    | 60.46          | [57.29; 63.55] |
| Huang et al, 2020 [ID# 94]              | 1317   | 7236   | 18.20          | [17.32; 19.11] |
| Innocenti et al, 2020 [ID# 97]          | 540    | 1035   | 52.17          | [49.08; 55.26] |
| Jahrami et al, 2020 [ID# 99]            | 191    | 257    | 74.32          | [68.52; 79.55] |
| Jim et al, 2021 [ID# 102]               | 101    | 404    | 25.00          | [20.85; 29.52] |
| Khalil et al, 2020 [ID# 107]            | 28     | 83     | 33.73          | [23.72; 44.95] |
| Kilani et al, 2020 [ID# 111]            | 736    | 1723   | 42.72          | [40.37; 45.09] |
| Kolokotroni et al, 2021 [ID# 115]       | 301    | 745    | 40.40          | [36.86; 44.03] |
| Li et al, 2021 [ID# 122]                | 13     | 51     | 25.49          | [14.33; 39.63] |
| Liu et al, 2020 [ID# 128]               | 59     | 285    | 20.70          | [16.15; 25.88] |
| Liu et al, 2021 [ID# 130]               | 561    | 2858   | 19.63          | [18.19; 21.13] |
| Mandelkorn et al, 2021 [ID# 137]        | 418    | 971    | 43.05          | [39.91; 46.23] |
| Mandelkorn et al, 2021 [ID# 137]        | 881    | 2562   | 34.39          | [32.55; 36.26] |
| Marelli et al, 2020 [ID# 138]           | 225    | 307    | 73.29          | [67.97; 78.16] |
| Marelli et al, 2020 [ID# 138]           | 178    | 307    | 57.98          | [52.24; 63.56] |
| Marelli et al, 2020 [ID# 138]           | 56     | 93     | 60.22          | [49.54; 70.22] |
| Marelli et al, 2020 [ID# 138]           | 45     | 93     | 48.39          | [37.89; 58.99] |
| Martínez-de-Quel et al, 2021 [ID# 140]  | 102    | 161    | 63.35          | [55.41; 70.80] |
| Martínez-de-Quel et al, 2021 [ID# 140]  | 121    | 161    | 75.16          | [67.74; 81.62] |
| Martínez-Lezaun et al, 2020 [ID# 141]   | 51     | 75     | 68.00          | [56.22; 78.31] |
| Martínez-Lezaun et al, 2020 [ID# 141]   | 72     | 102    | 70.59          | [60.75; 79.20] |
| Meo et al, 2021 [ID# 146]               | 1376   | 1678   | 82.00          | [80.08; 83.81] |
| Poyraz et al, 2021 [ID# 157]            | 101    | 284    | 35.56          | [30.00; 41.43] |
| Repon et al, 2021 [ID# 161]             | 309    | 355    | 87.04          | [83.10; 90.35] |
| Robillard et al, 2020 [ID# 162]         | 2750   | 5525   | 49.77          | [48.45; 51.10] |
| Saadeh et al, 2021 [ID# 166]            | 4680   | 6157   | 76.01          | [74.92; 77.07] |
| Saguem et al, 2021 [ID# 170]            | 182    | 251    | 72.51          | [66.54; 77.94] |
| Salli et al, 2021 [ID# 172]             | 8053   | 13989  | 57.57          | [56.74; 58.39] |
| Sañudo et al, 2020 [ID# 173]            | 9      | 20     | 45.00          | [23.06; 68.47] |
| Saracoglu et al, 2020 [ID# 174]         | 95     | 208    | 45.67          | [38.77; 52.70] |
| Saraswathi et al, 2020 [ID# 175]        | 75     | 217    | 34.56          | [28.25; 41.30] |
| Shillington et al, 2021 [ID# 182]       | 1402   | 2192   | 63.96          | [61.91; 65.97] |
| Simonetti et al, 2021 [ID# 183]         | 761    | 1005   | 75.72          | [72.95; 78.34] |
| Stewart et al, 2021 [ID# 186]           | 920    | 963    | 95.53          | [94.03; 96.75] |
| Trabelsi et al, 2021 [ID# 194]          | 222    | 517    | 42.94          | [38.63; 47.33] |
| Trabelsi et al, 2021 [ID# 194]          | 295    | 517    | 57.06          | [52.67; 61.37] |
| Trabelsi et al, 2021 [ID# 195]          | 2651   | 5056   | 52.43          | [51.05; 53.82] |
| Trabelsi et al, 2021 [ID# 195]          | 1993   | 5056   | 39.42          | [38.07; 40.78] |
| Tu et al, 2020 [ID# 197]                | 60     | 100    | 60.00          | [49.72; 69.67] |
| Varma et al, 2021 [ID# 198]             | 1207   | 1653   | 73.02          | [70.81; 75.15] |
| Vitale et al, 2020 [ID# 199]            | 3      | 4      | 75.00          | [19.41; 99.37] |
| Wang et al, 2020 [ID# 202]              | 218    | 274    | 79.56          | [74.30; 84.18] |
| Wang et al, 2020 [ID# 209]              | 1136   | 6437   | 17.65          | [16.72; 18.60] |
| Wang et al, 2020 [ID# 210]              | 1233   | 2001   | 61.62          | [59.45; 63.76] |
| Wang et al, 2020 [ID# 211]              | 47     | 123    | 38.21          | [29.60; 47.41] |
| Windiani et al, 2021 [ID# 215]          | 62     | 204    | 30.39          | [24.16; 37.20] |
| Wu et al, 2020 [ID# 216]                | 60     | 120    | 50.00          | [40.74; 59.26] |
| Xia et al, 2021 [ID# 217]               | 157    | 288    | 54.51          | [48.57; 60.37] |
| Xu et al, 2021 [ID# 218]                | 103    | 274    | 37.59          | [31.84; 43.62] |
| Yadav et al, 2021 [ID# 219]             | 62     | 100    | 62.00          | [51.75; 71.52] |
| Yang et al, 2020 [ID# 220]              | 144    | 2410   | 5.98           | [5.06; 7.00]   |
| Zhang et al, 2020 [ID# 230]             | 894    | 2027   | 44.10          | [41.93; 46.30] |
| Zhang et al, 2020 [ID# 231]             | 185    | 205    | 90.24          | [85.33; 93.94] |
| Zhang et al, 2020 [ID# 233]             | 75     | 135    | 55.56          | [46.76; 64.10] |
| Zhang et al, 2021 [ID# 234]             | 124    | 319    | 38.87          | [33.49; 44.46] |
| Zhang et al, 2021 [ID# 235]             | 174    | 456    | 38.16          | [33.68; 42.79] |
| Zhang et al, 2020 [ID# 240]             | 28     | 66     | 42.42          | [30.34; 55.21] |
| Zhao et al, 2020 [ID# 241]              | 141    | 215    | 65.58          | [58.82; 71.91] |
| Zheng et al, 2021 [ID# 242]             | 71     | 207    | 34.30          | [27.86; 41.20] |
| Zheng et al, 2020 [ID# 243]             | 261    | 631    | 41.36          | [37.49; 45.32] |
| Zhao et al, 2020 [ID# 244]              | 2747   | 11835  | 23.21          | [22.45; 23.98] |
| Zhou et al, 2020 [ID# 246]              | 355    | 1931   | 18.38          | [16.68; 20.19] |
| Random effects model                    |        | 134177 | 51.87          | [47.87; 55.84] |

Heterogeneity:  $I^2 = 99.42\%$ ,  $\tau^2 = 0.73$ ,  $p = 0$

| Study                                    | Number | Total | Prevalence (%) | 95%CI          |
|------------------------------------------|--------|-------|----------------|----------------|
| Abdulah et al, 2020 [ID# 3]              | 183    | 268   | 68.28          | [62.35; 73.81] |
| Alharbi et al, 2021 [ID# 14]             | 430    | 790   | 54.43          | [50.88; 57.94] |
| Blekas et al, 2020 [ID# 38]              | 96     | 270   | 35.56          | [29.85; 41.58] |
| Caballero-Domínguez et al, 2020 [ID# 41] | 294    | 700   | 42.00          | [38.31; 45.76] |
| Fu et al, 2020 [ID# 74]                  | 379    | 1242  | 30.52          | [27.96; 33.16] |
| Idrissi et al, 2020 [ID# 96]             | 463    | 827   | 55.99          | [52.53; 59.40] |
| Parlapani et al, 2020 [ID# 153]          | 39     | 103   | 37.86          | [28.49; 47.96] |
| Pedrozo-Pupo et al, 2020 [ID# 154]       | 169    | 292   | 57.88          | [51.99; 63.61] |
| Qi et al, 2020 [ID# 158]                 | 594    | 1306  | 45.48          | [42.76; 48.23] |
| Tselebis et al, 2020 [ID# 196]           | 74     | 150   | 49.33          | [41.08; 57.51] |
| Voitaidis et al, 2020 [ID# 200]          | 913    | 2427  | 37.62          | [35.69; 39.58] |
| Zhan et al, 2020 [ID# 229]               | 948    | 1794  | 52.84          | [50.50; 55.17] |
| Random effects model                     |        | 10169 | 47.22          | [41.37; 53.15] |

Heterogeneity:  $I^2 = 96.91\%$ ,  $\tau^2 = 0.17$ ,  $p < 0.001$

| Study                               | Number | Total | Prevalence (%) | 95%CI          |
|-------------------------------------|--------|-------|----------------|----------------|
| Agberotimi et al, 2020 [ID# 4]      | 203    | 884   | 22.96          | [20.23; 25.88] |
| Al Ammari et al, 2021 [ID# 7]       | 102    | 720   | 14.17          | [11.70; 16.93] |
| Alamrawy et al, 2021 [ID# 10]       | 330    | 447   | 73.83          | [69.49; 77.84] |
| AlAteeq et al, 2021 [ID# 11]        | 881    | 1313  | 67.10          | [64.48; 69.64] |
| Ali et al, 2021 [ID# 15]            | 130    | 294   | 44.22          | [38.45; 50.10] |
| Almater et al, 2020 [ID# 16]        | 48     | 107   | 44.86          | [35.23; 54.78] |
| Alshekaili et al, 2020 [ID# 21]     | 211    | 1139  | 18.53          | [16.31; 20.91] |
| Amra et al, 2021 [ID# 23]           | 131    | 372   | 35.22          | [30.36; 40.31] |
| Atas et al, 2021 [ID# 25]           | 40     | 106   | 37.74          | [28.50; 47.67] |
| Bacaro et al, 2020 [ID# 26]         | 370    | 1989  | 18.60          | [16.91; 20.38] |
| Badellino et al, 2020 [ID# 27]      | 459    | 1985  | 23.12          | [21.28; 25.04] |
| Bajaj et al, 2020 [ID# 29]          | 209    | 391   | 53.45          | [48.37; 58.48] |
| Begalke et al, 2020 [ID# 37]        | 49     | 103   | 47.57          | [37.64; 57.65] |
| Brito-Marques et al, 2021 [ID# 40]  | 268    | 332   | 80.72          | [76.06; 84.83] |
| Cai et al, 2020 [ID# 42]            | 902    | 2346  | 38.45          | [36.47; 40.45] |
| Cai et al, 2020 [ID# 43]            | 521    | 1330  | 39.17          | [36.54; 41.86] |
| Chatterjee et al, 2021 [ID# 48]     | 67     | 140   | 47.86          | [39.35; 56.46] |
| Chen et al, 2021 [ID# 49]           | 123    | 834   | 14.75          | [12.41; 17.34] |
| Cui et al, 2020 [ID# 55]            | 365    | 891   | 40.97          | [37.71; 44.28] |
| Elhadi et al, 2021 [ID# 64]         | 1952   | 10296 | 18.96          | [18.21; 19.73] |
| Elkholy et al, 2021 [ID# 66]        | 125    | 502   | 24.90          | [21.18; 28.92] |
| Essangri et al, 2020 [ID# 67]       | 344    | 549   | 62.66          | [58.46; 66.72] |
| Fekih-Romdhane et al, 2020 [ID# 69] | 87     | 210   | 41.43          | [34.69; 48.41] |
| Florin et al, 2020 [ID# 72]         | 186    | 1515  | 12.28          | [10.67; 14.04] |
| Ge et al, 2020 [ID# 78]             | 339    | 2009  | 16.87          | [15.26; 18.58] |
| Giardino et al, 2020 [ID# 80]       | 780    | 1059  | 73.65          | [70.89; 76.29] |
| Gu et al, 2020 [ID# 83]             | 77     | 522   | 14.75          | [11.82; 18.09] |
| Gualano et al, 2020 [ID# 84]        | 624    | 1515  | 41.19          | [38.70; 43.71] |
| Gupta et al, 2020 [ID# 86]          | 20     | 379   | 5.28           | [3.25; 8.03]   |
| Gupta et al, 2020 [ID# 86]          | 63     | 579   | 10.88          | [8.46; 13.71]  |
| Hao et al, 2020 [ID# 87]            | 23     | 185   | 12.43          | [8.05; 18.07]  |
| Haravuori et al, 2020 [ID# 88]      | 1997   | 4804  | 41.57          | [40.17; 42.98] |
| Hendrickson et al, 2020 [ID# 90]    | 33     | 118   | 27.97          | [20.10; 36.98] |
| Huang et al, 2020 [ID# 93]          | 289    | 1172  | 24.66          | [22.21; 27.23] |
| Jain et al, 2020 [ID# 100]          | 310    | 512   | 60.55          | [56.16; 64.81] |
| Juanjuan et al, 2020 [ID# 103]      | 349    | 658   | 53.04          | [49.14; 56.91] |
| Khanal et al, 2020 [ID# 109]        | 161    | 475   | 33.89          | [29.64; 38.35] |
| Khoury et al, 2021 [ID# 110]        | 119    | 303   | 39.27          | [33.74; 45.02] |
| Kilgore et al, 2020 [ID# 112]       | 568    | 1013  | 56.07          | [52.95; 59.16] |
| Kocavska et al, 2020 [ID# 113]      | 446    | 667   | 66.87          | [63.15; 70.43] |
| Kokou-Kpolou et al, 20              |        |       |                |                |
