# Supplementary material
Source: PubMed Central journal article supplement (PMC8782754)

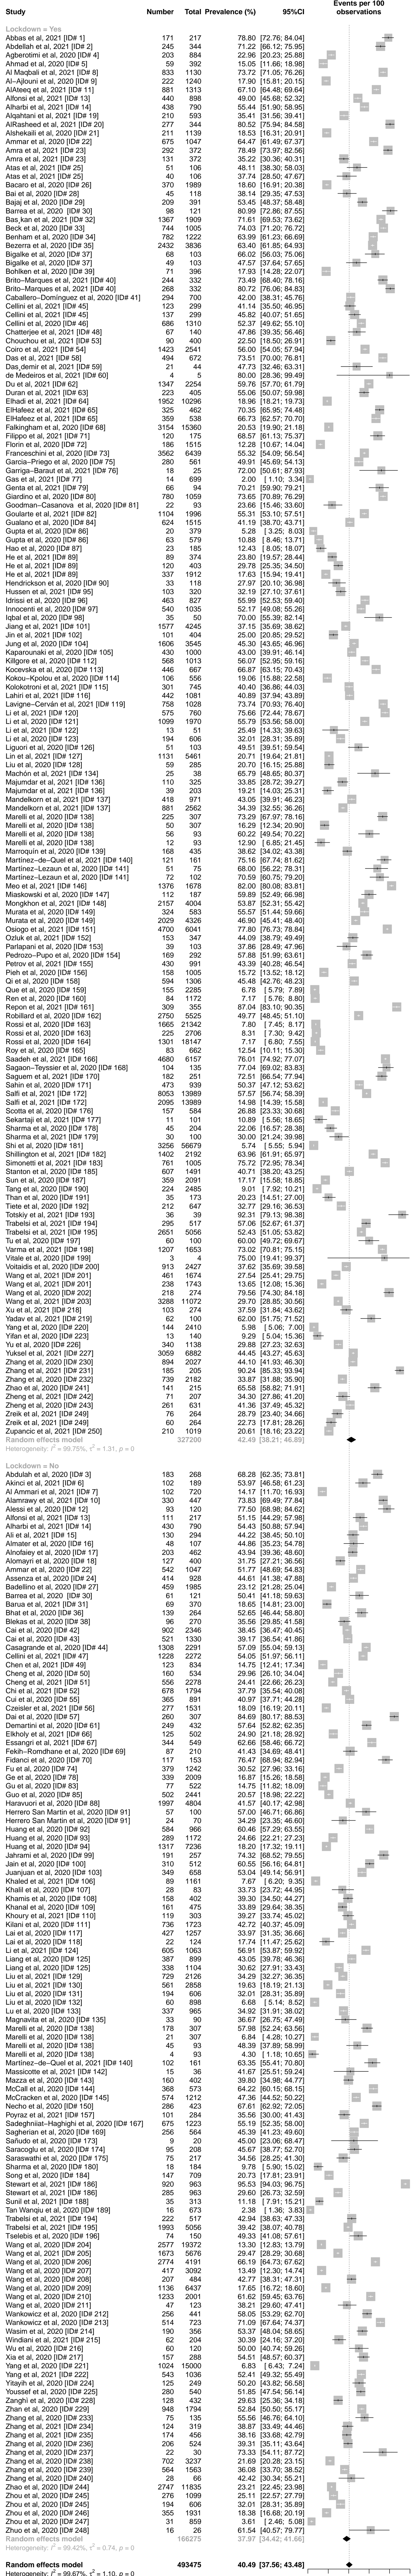

Supplement: mmc11.pdf [file mmc11.pdf]

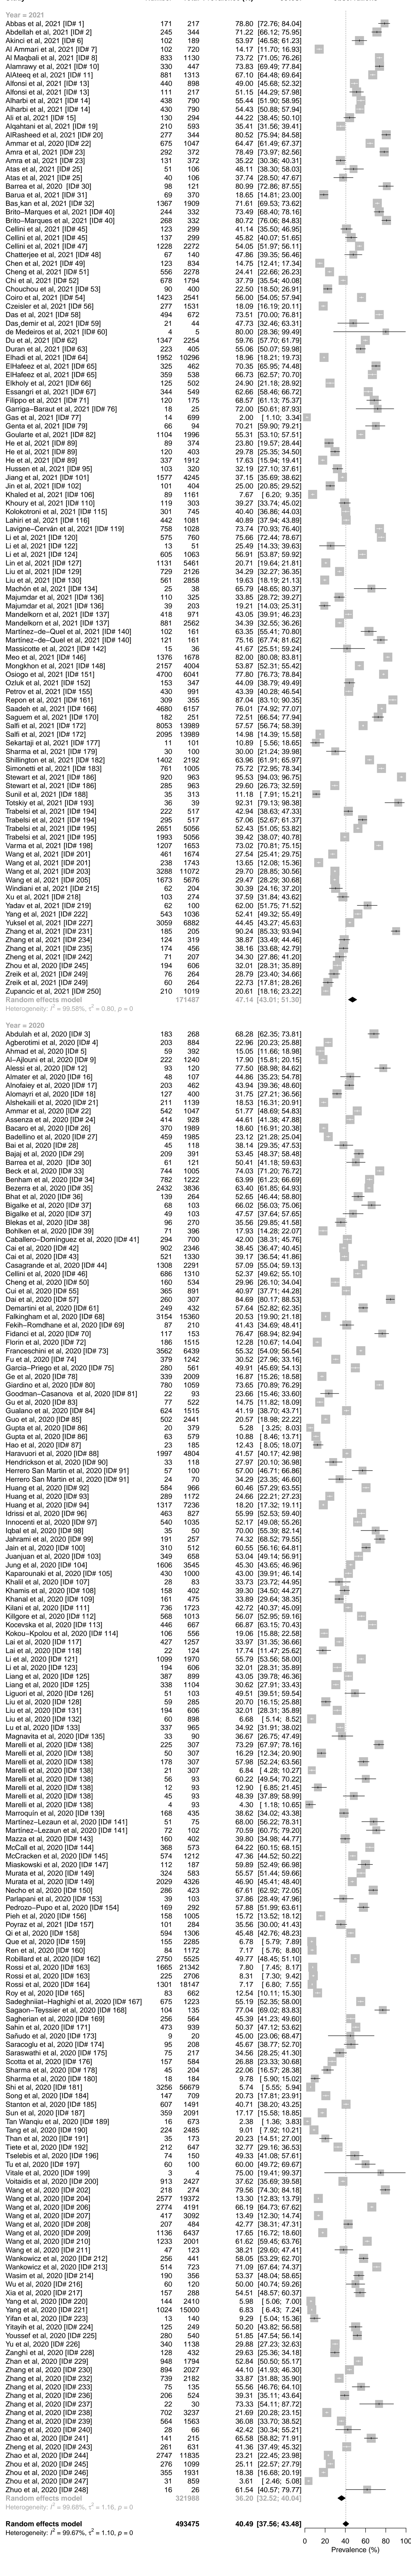

Supplement: mmc12.pdf [file mmc12.pdf]

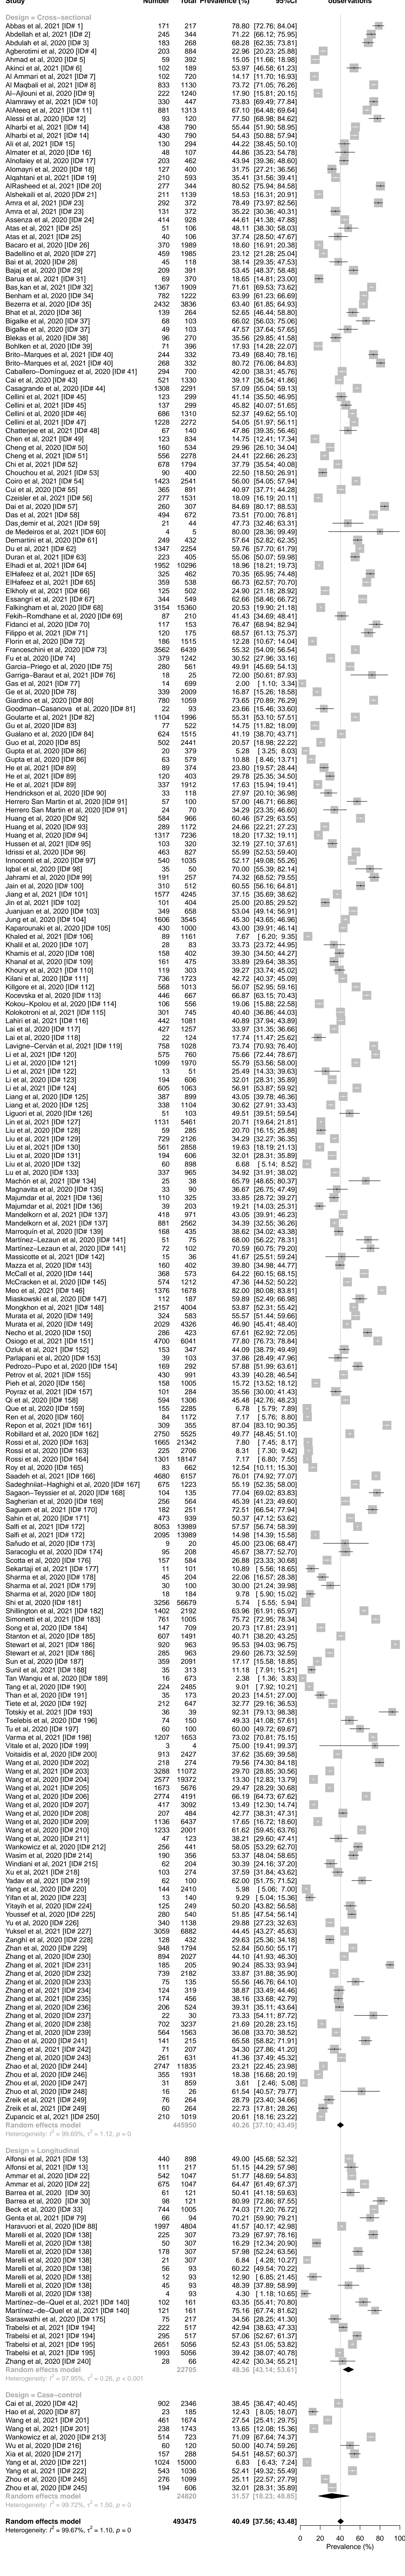

Supplement: mmc13.pdf [file mmc13.pdf]

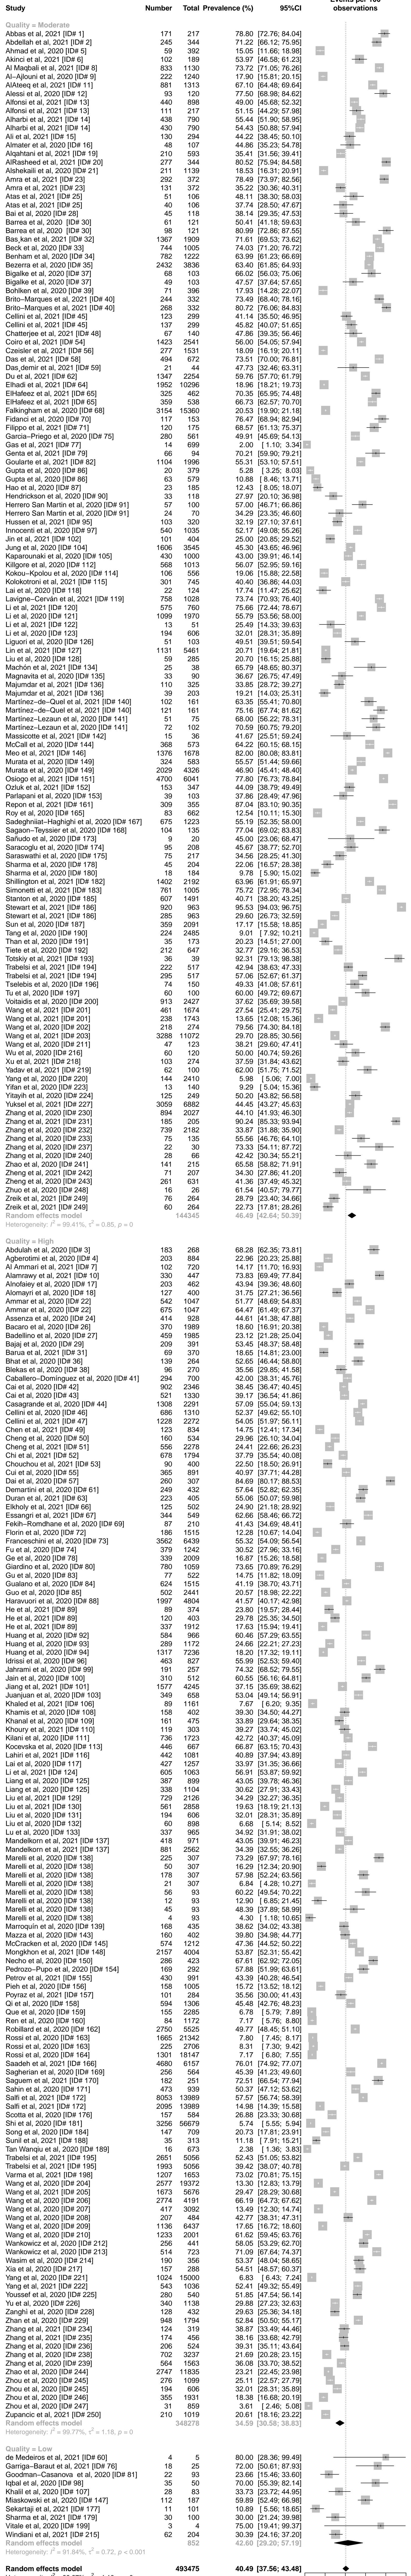

Supplement: mmc14.pdf [file mmc14.pdf]

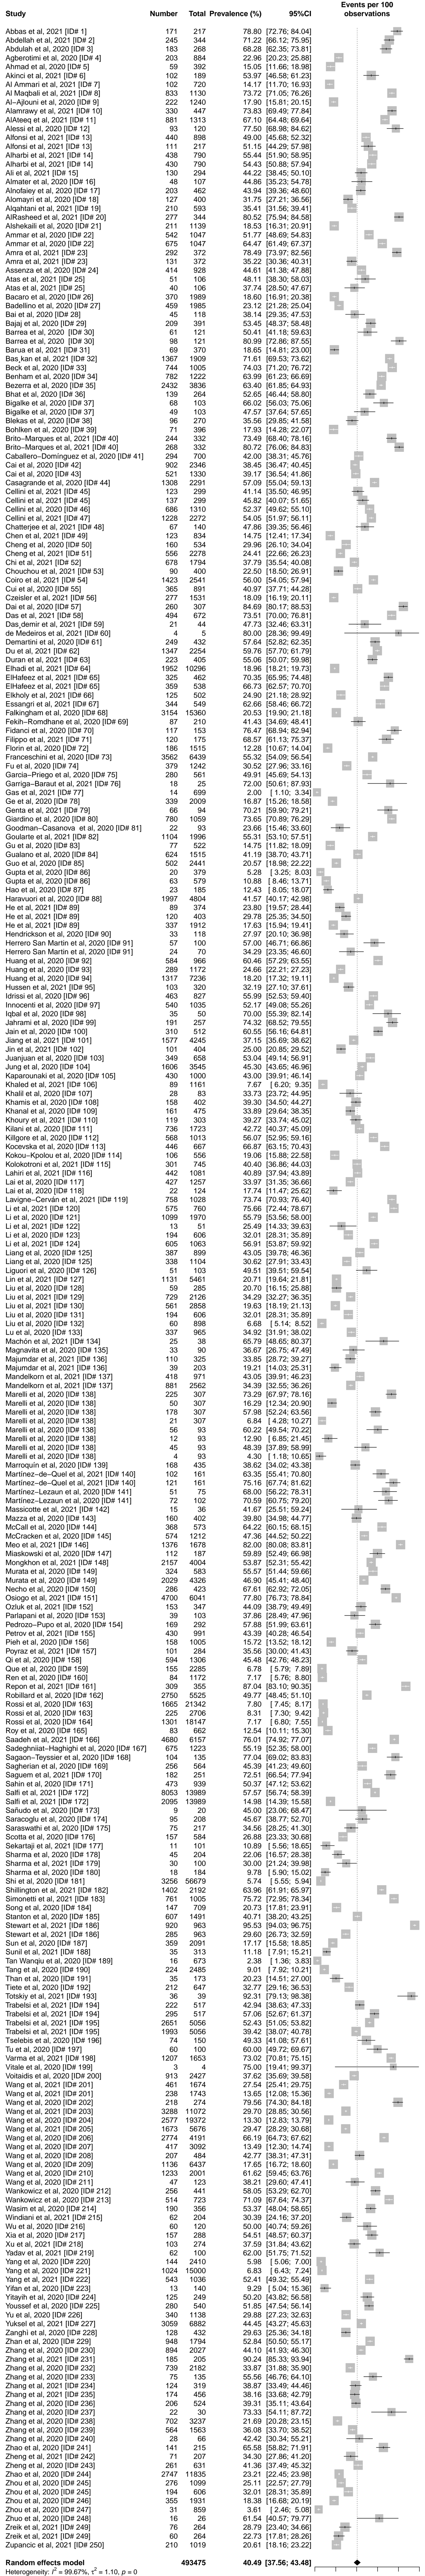

Random effects model  
 Heterogeneity:  $I^2 = 99.67\%$ ,  $\tau^2 = 1.10$ ,  $p = 0$

493475 40.49 [37.56; 43.48]

Supplement: mmc2.pdf [file mmc2.pdf]

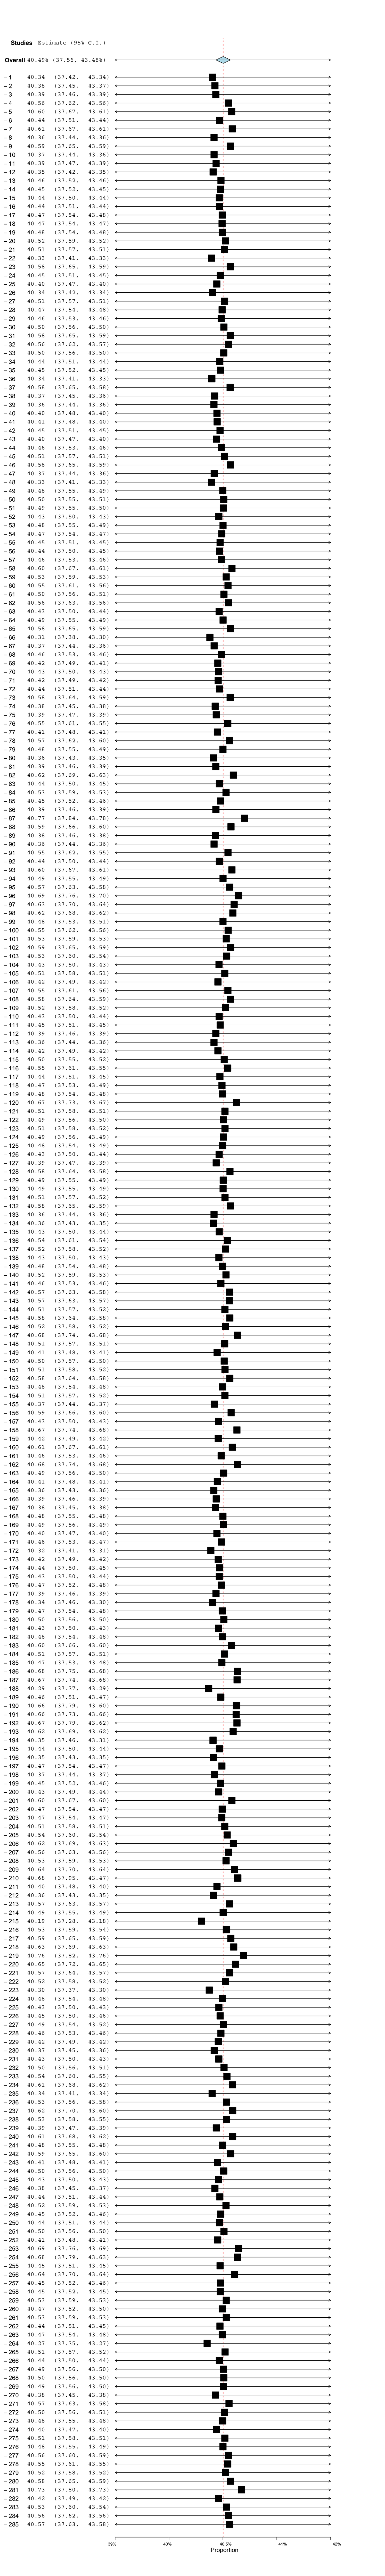

Supplement: mmc3.pdf [file mmc3.pdf]

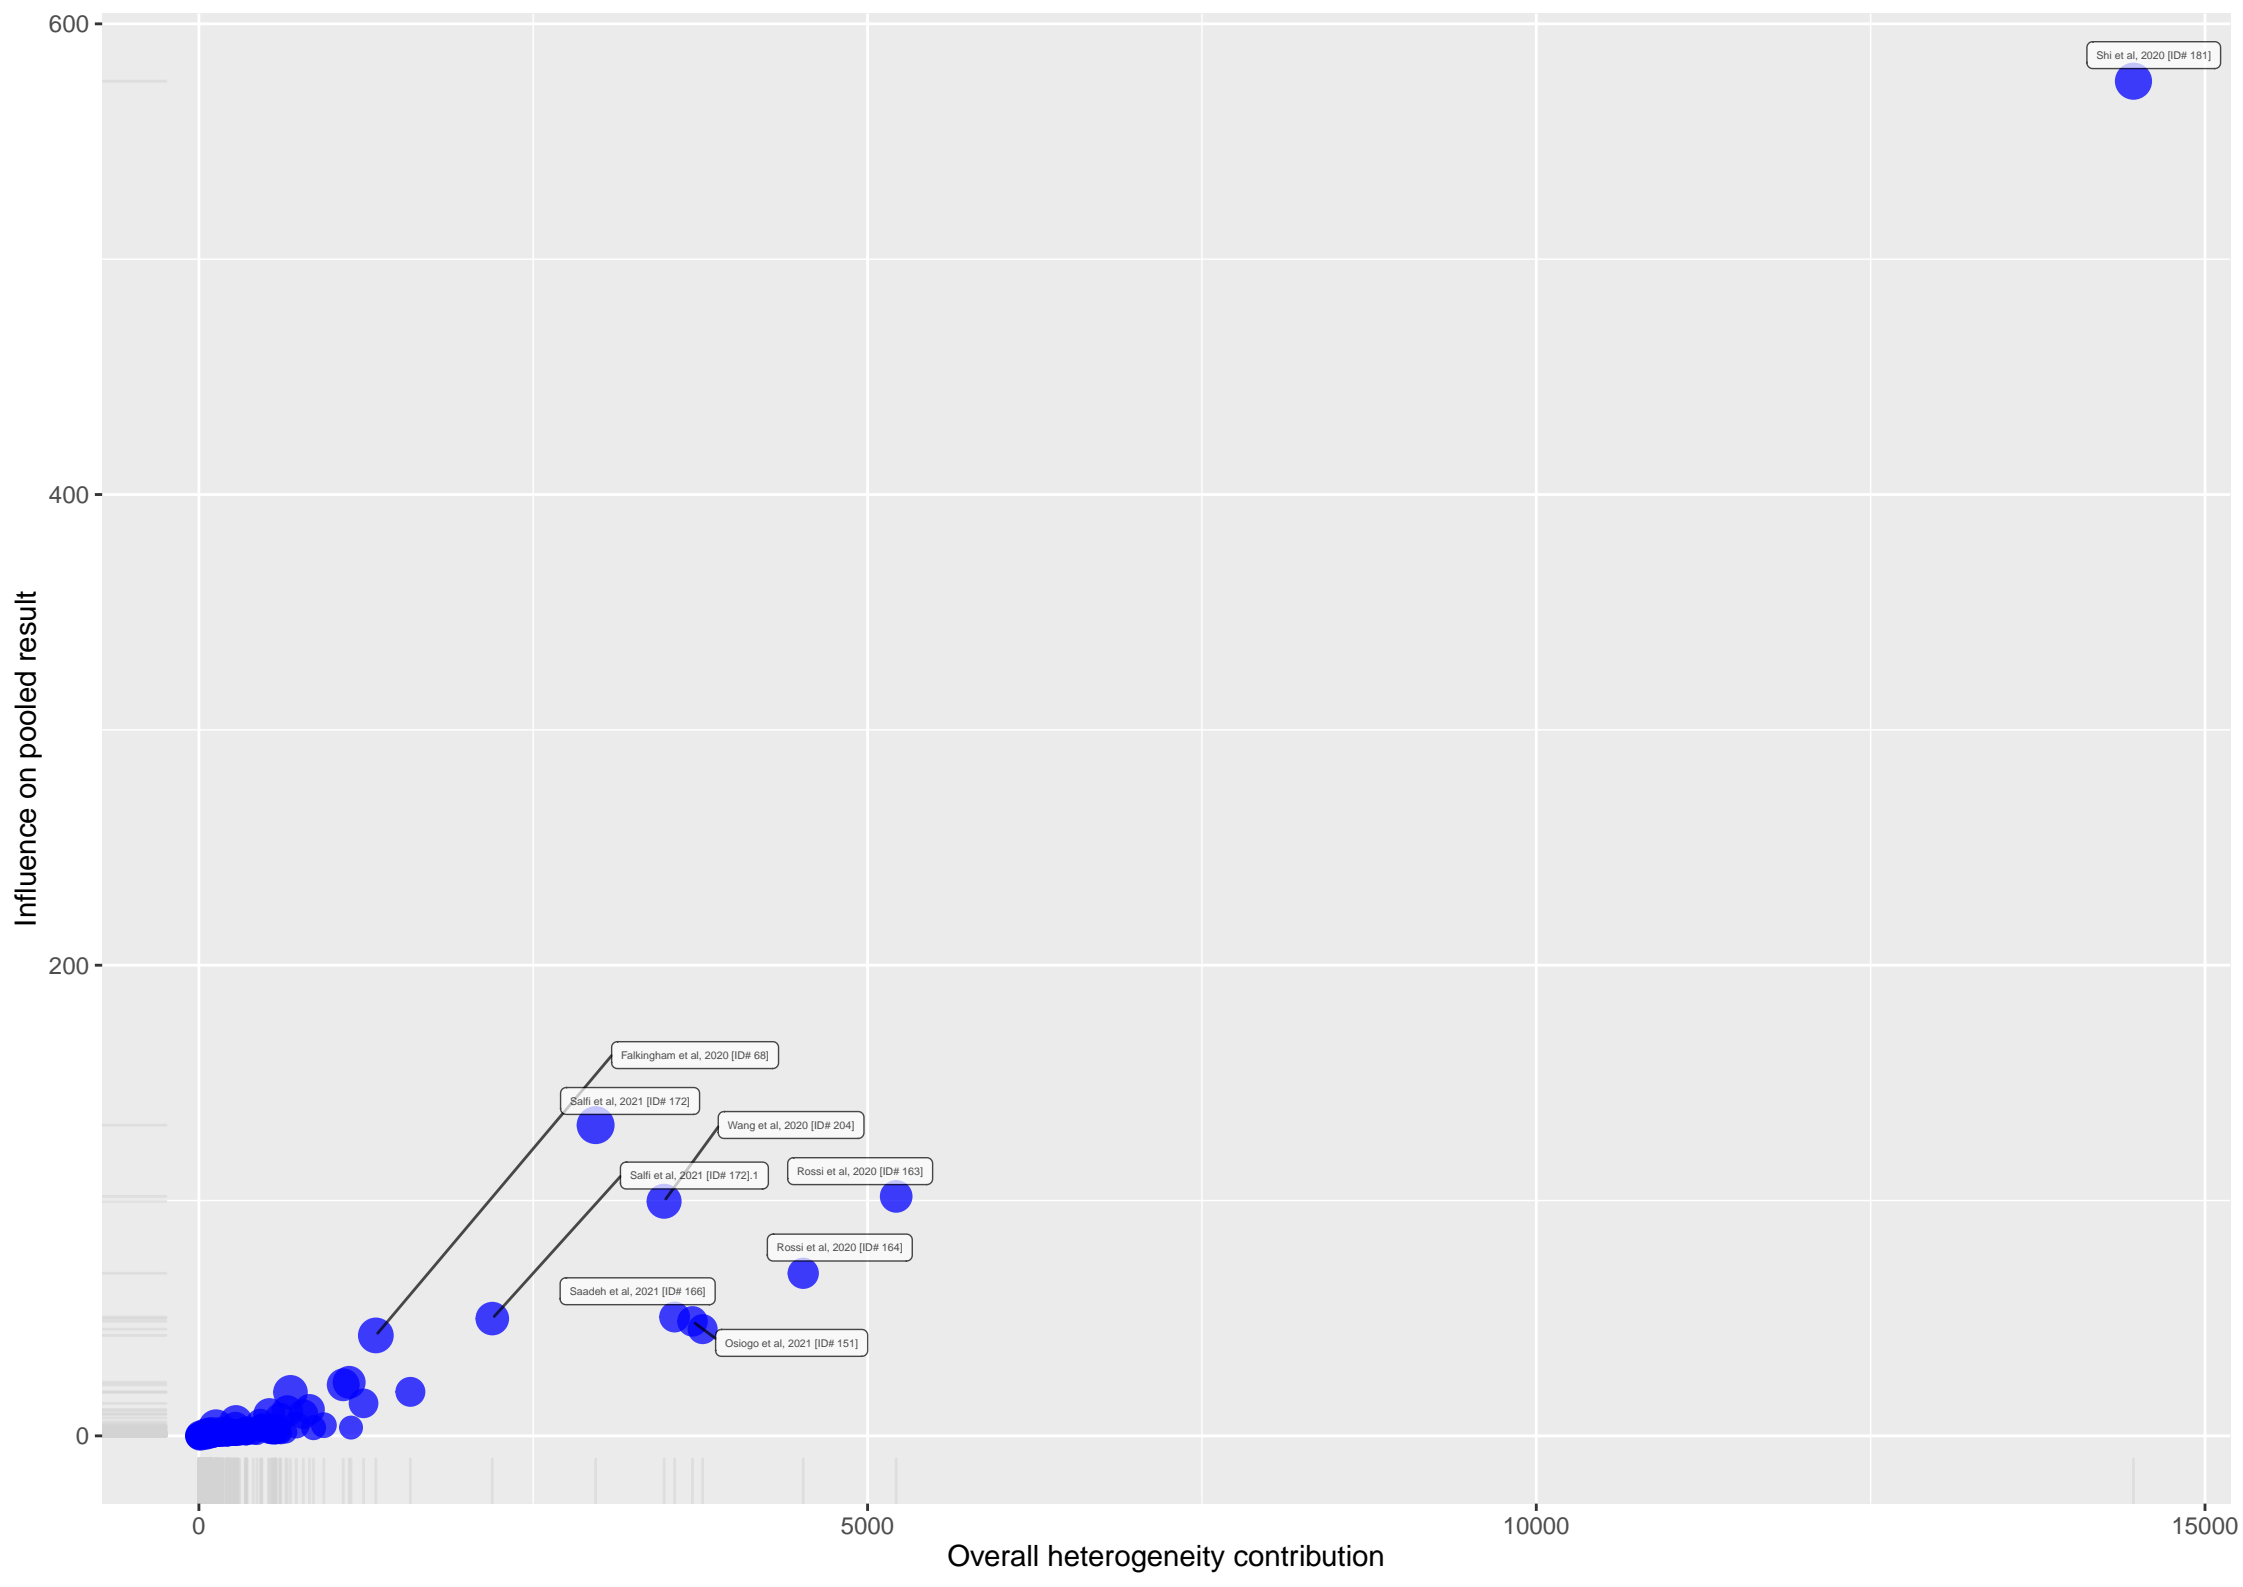

Supplement: mmc4.pdf [file mmc4.pdf]

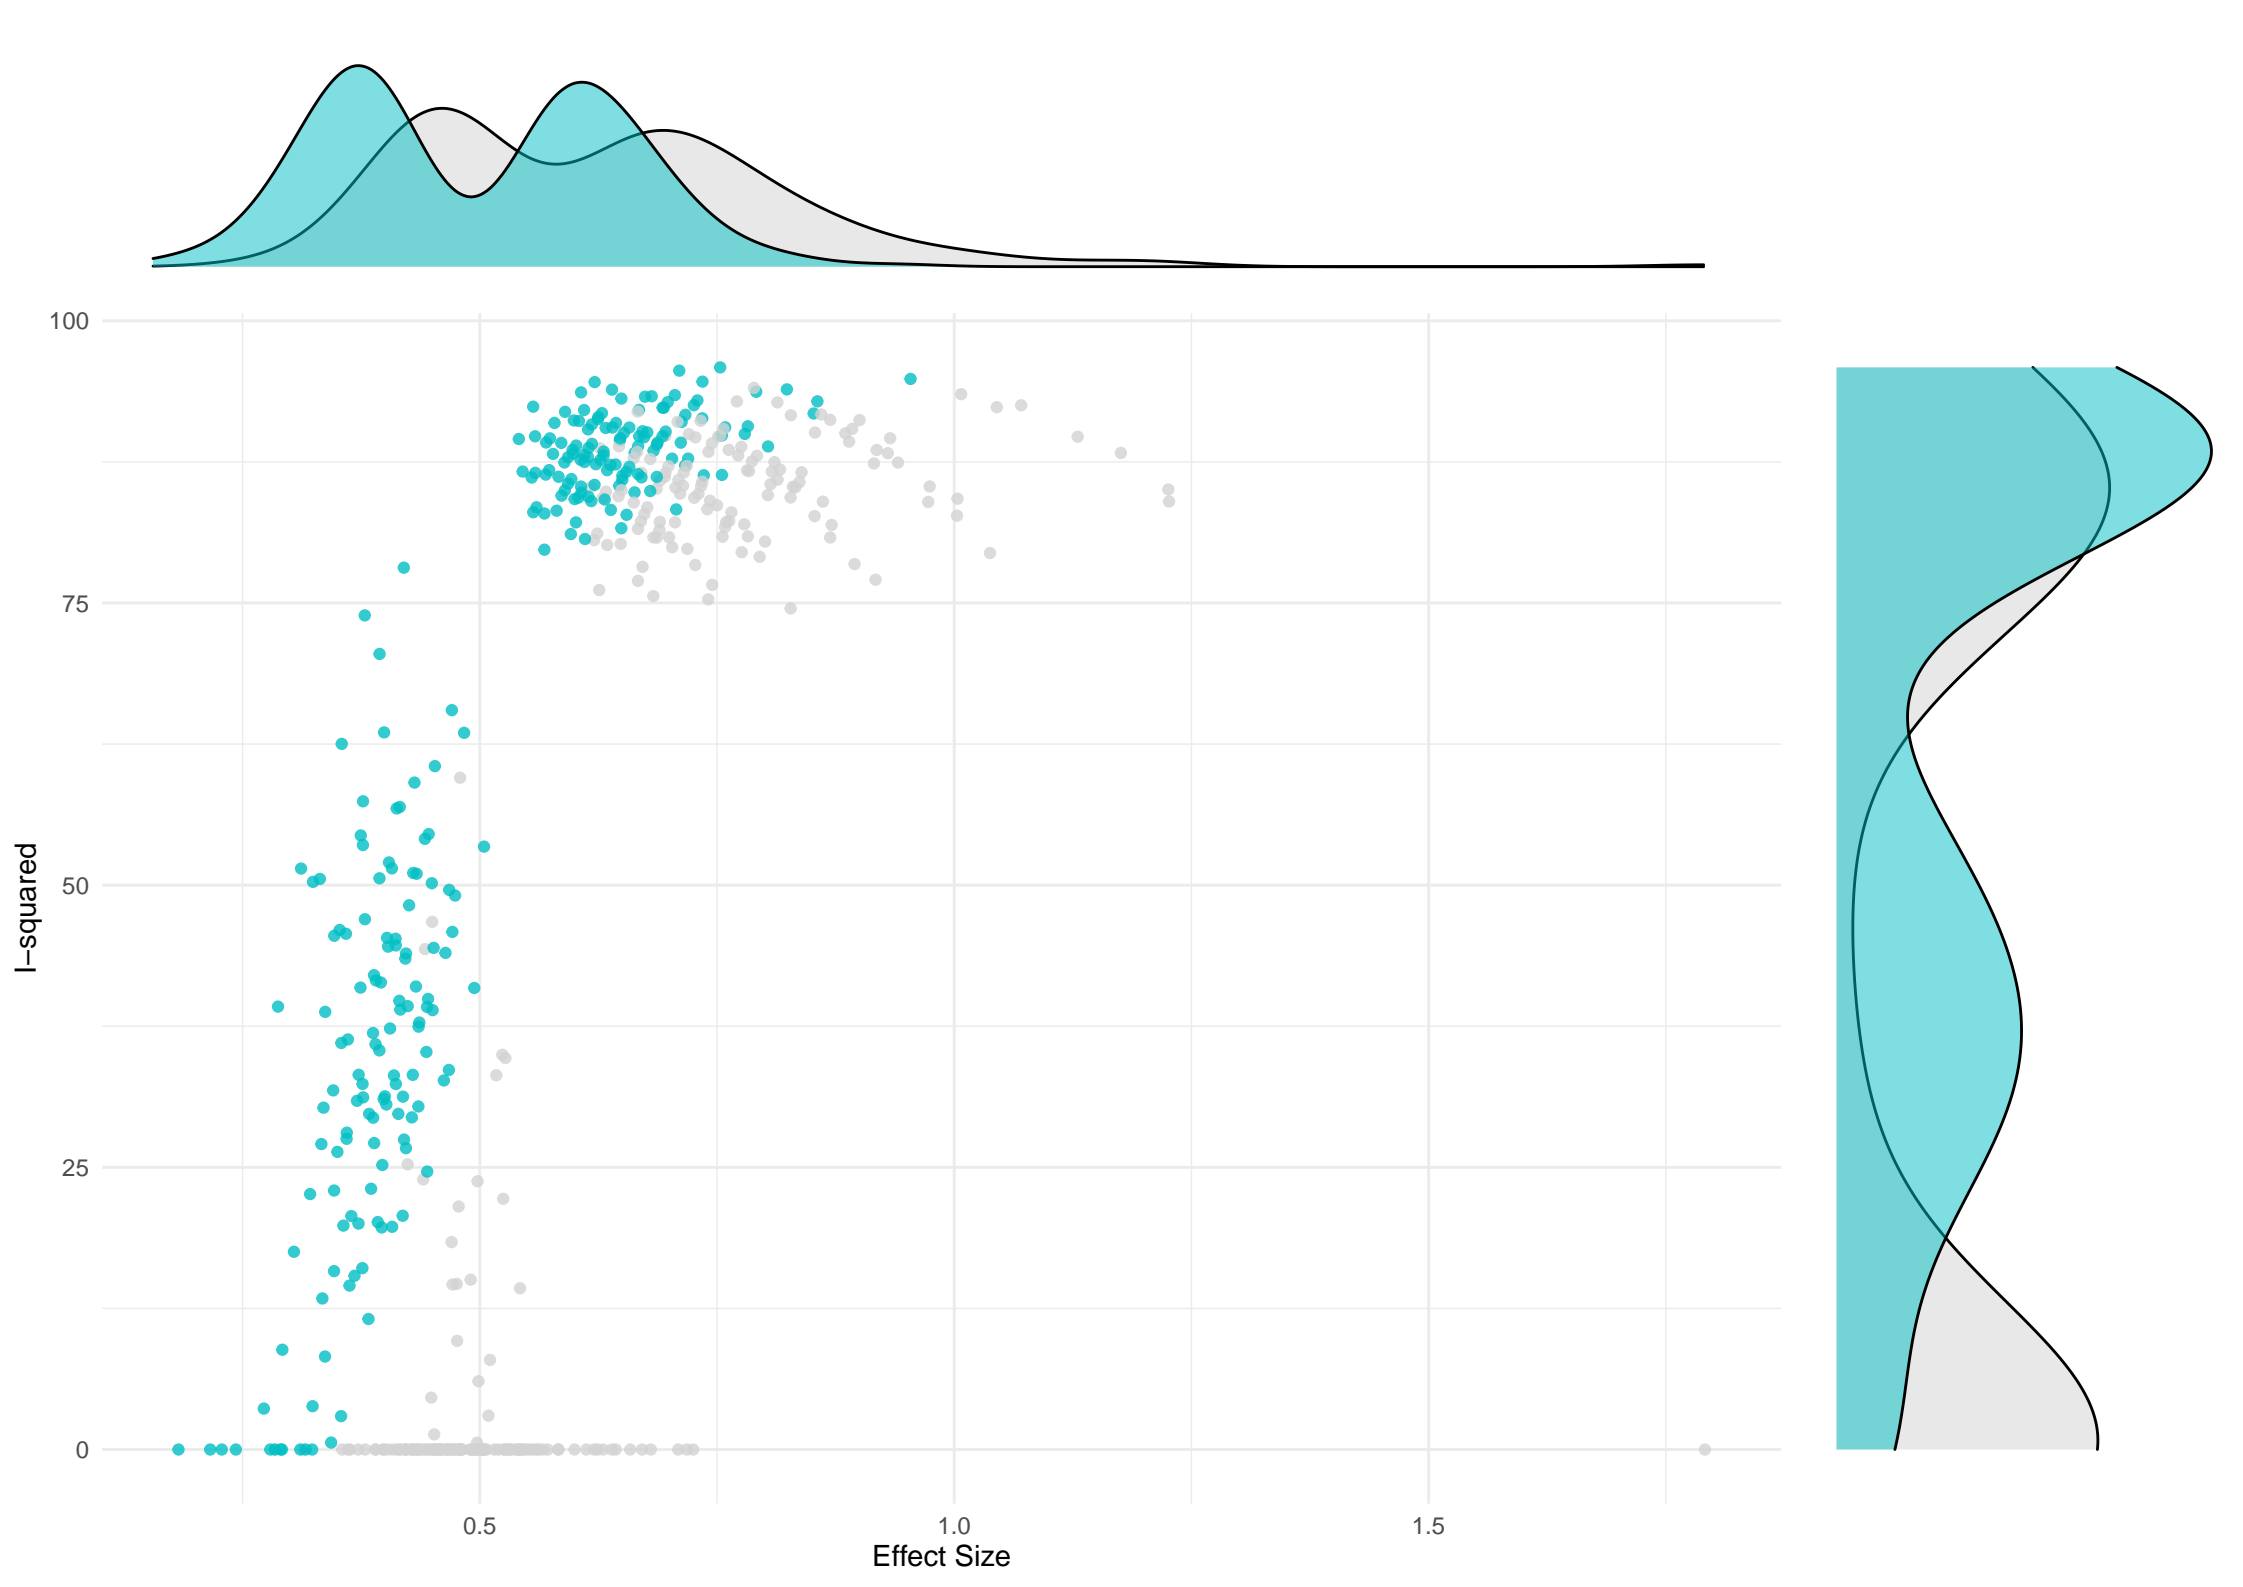

Supplement: mmc5.pdf [file mmc5.pdf]

Gaussian Mixture Model

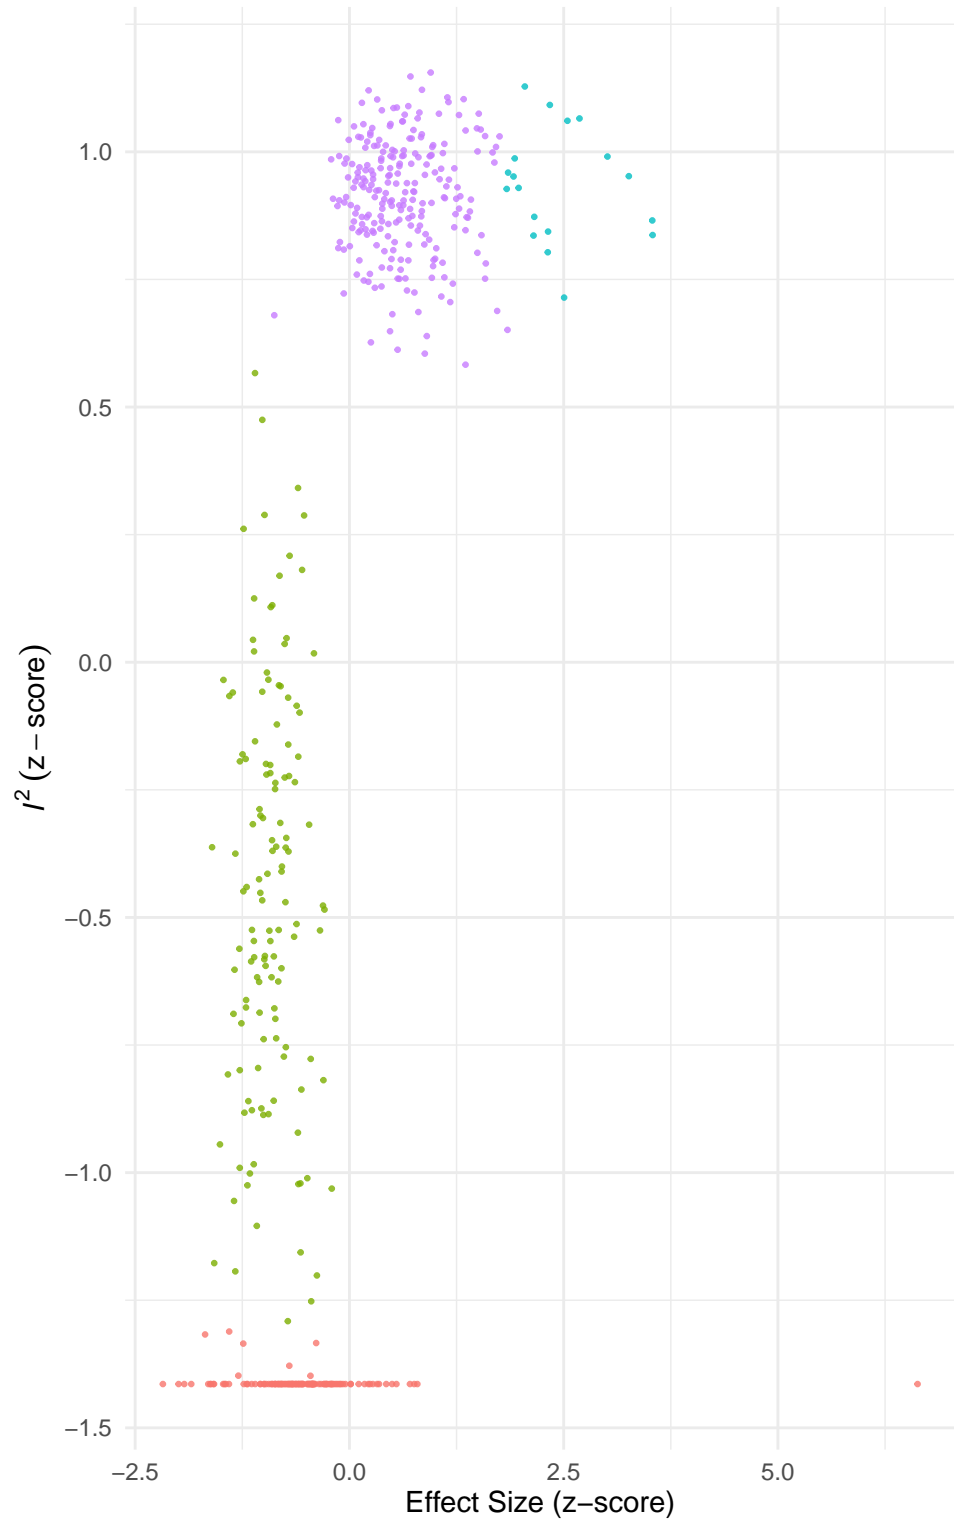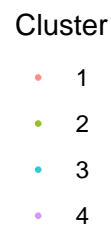

Cluster imbalance (GMM)

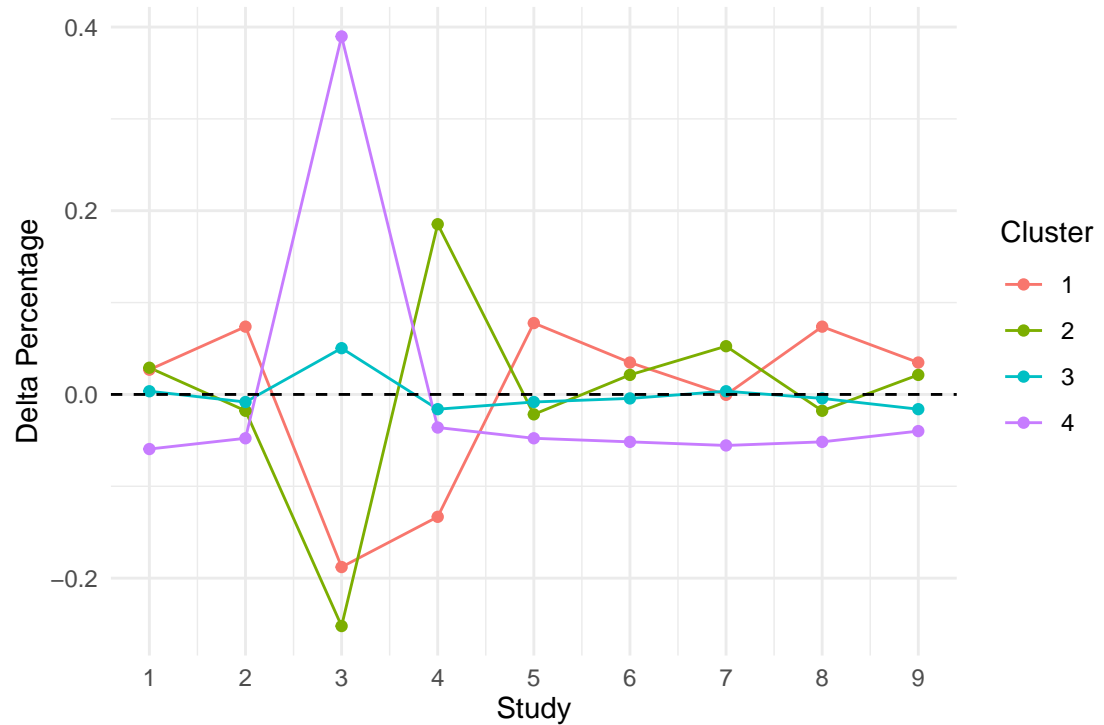

Cluster imbalance (Cook's Distance)

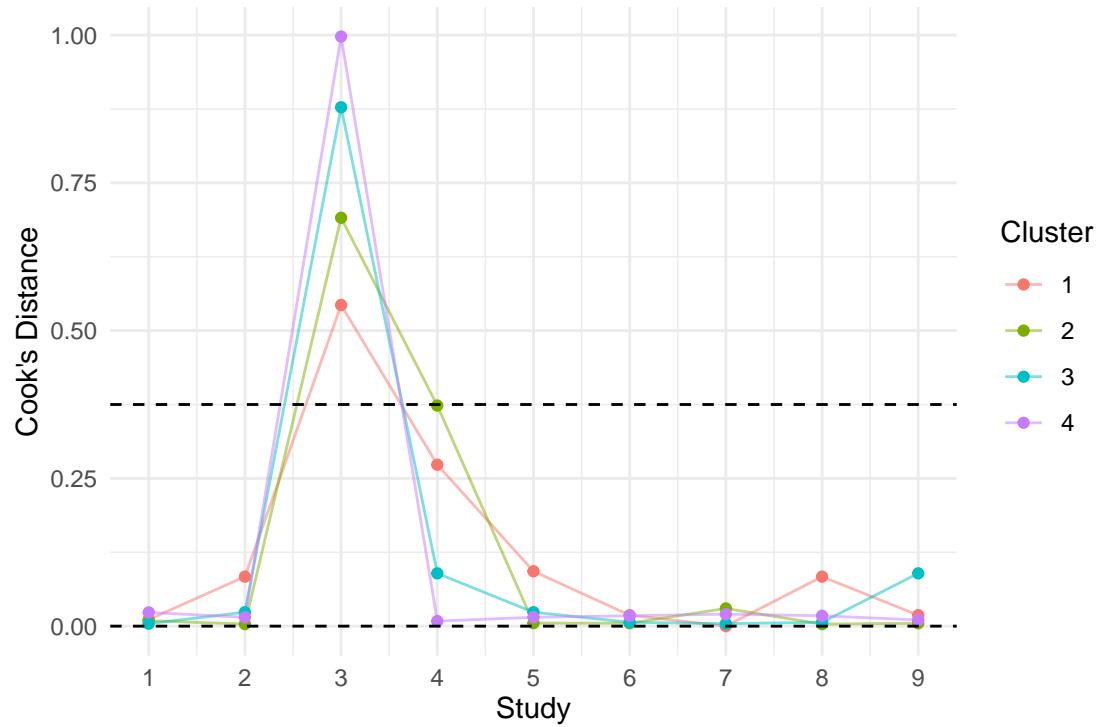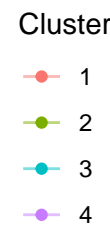

Supplement: mmc6.pdf [file mmc6.pdf]

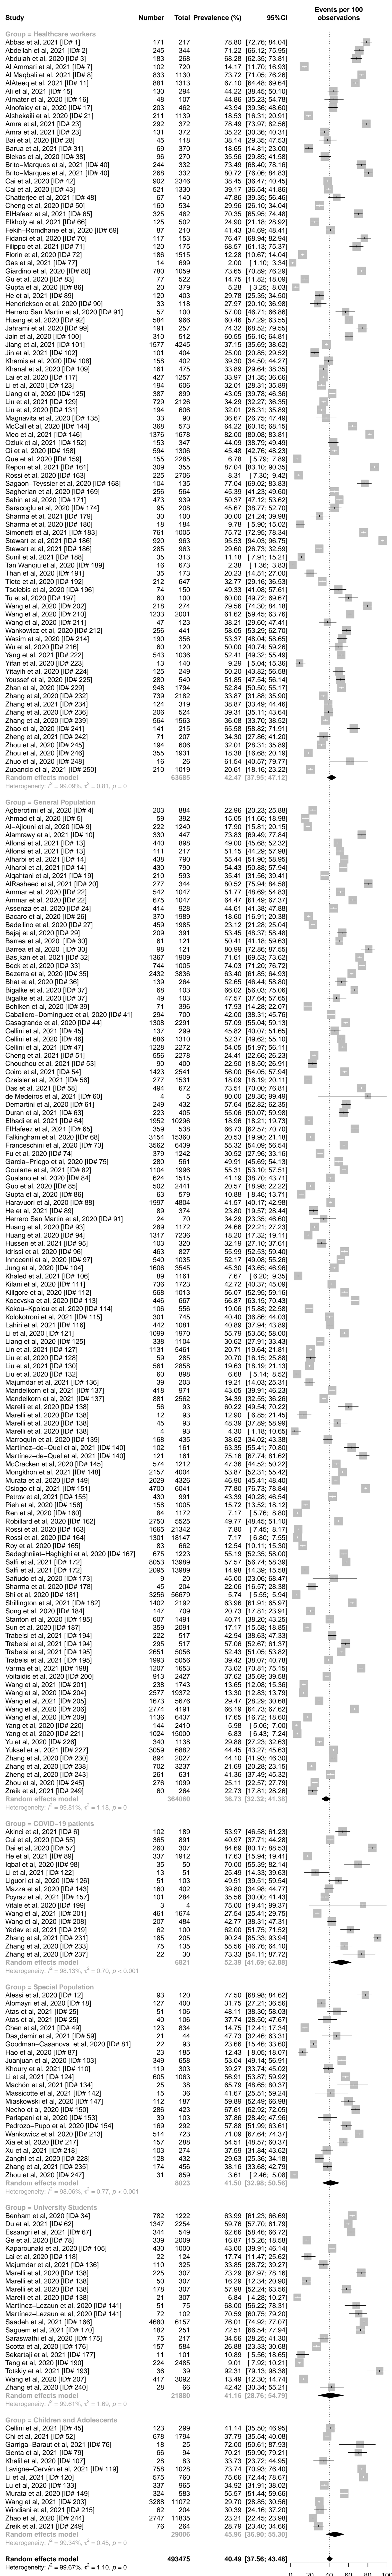

Supplement: mmc9.pdf [file mmc9.pdf]
